# Supplementary material
Source: PubMed Central journal article supplement (PMC4508249)
Supplement: NIHMS642757-supplement-3.pdf [file NIHMS642757-supplement-3.pdf]

Supplement 2. Probe sets for genes related to heat shock protein chaperones in serotonin neurons. All probe sets changed 2-fold or greater with E or E+P treatment compared to placebo treatment of OvX macaques.

| Search     | Mean Signal Intensity |         |         | Gene Identifier | Other ID               | Gene Name                                                                                                                                                       |
|------------|-----------------------|---------|---------|-----------------|------------------------|-----------------------------------------------------------------------------------------------------------------------------------------------------------------|
|            | OvX                   | E       | E+P     |                 |                        |                                                                                                                                                                 |
| heat shock | 361.4                 | 8826.45 | 4517.7  | CB552559        | Mmu.8286.1.S1_s_at     | gb:CB552559 DB_XREF=gi:31301754 DB_XREF=MMSP0025_B10 TID=Mmu.8286.1 CNT=4 FEA=EST TIER=ConsEnd STK=0 NOTE=sequence(s) clustered along genome                    |
|            | 93.1                  | 1622.75 | 172.1   | BQ807639        | Mmu.1995.1.S1_s_at     | gb:BQ807639 DB_XREF=gi:22031848 DB_XREF=NISC_kk07c01.y2 CLONE=IMAGE:5330688 TID=Mmu.1995.1 CNT=4 FEA=EST TIER=ConsEnd STK=0                                     |
|            | 150.8                 | 1879.75 | 986.15  | AI582238        | MmugDNA.30167.1.S1_at  | gDNA.Hs.82689.0.S1 FEA=U133PSR GEN=TRA1 DEF=Orthologous to 200598_s_at tumor rejection antigen (gp96) 1                                                         |
|            | 615.65                | 6388.45 | 3249.95 | CO648366        | Mmu.156.2.S1_x_at      | gb:CO648366 DB_XREF=gi:50569860 DB_XREF=ILLUMIGEN_MCQ_41712 CLONE=IBIUW:24543 TID=Mmu.156.2 CNT=3 FEA=EST TIER=ConsEnd STK=0                                    |
|            | 61.65                 | 641.7   | 258.35  | CN648028        | Mmu.11204.1.S1_s_at    | gb:CN648028 DB_XREF=gi:47161471 DB_XREF=ILLUMIGEN_MCQ_29593 CLONE=IBIUW:7012 TID=Mmu.11204.1 CNT=14 FEA=EST TIER=ConsEnd STK=0                                  |
|            | 140                   | 1341.45 | 627.6   | BG612458        | MmugDNA.42578.1.S1_at  | gDNA.Hs2.434250.1.S1 FEA=U133PSR GEN=HSPCB DEF=Orthologous to 1557910_at heat shock 90kDa protein 1, beta                                                       |
|            | 890.35                | 9712.5  | 2563.1  | AF275719        | MmugDNA.32274.1.S1_at  | gDNA.g9082288 FEA=U133PSR GEN=HSPCB DEF=Orthologous to 200064_at heat shock 90kDa protein 1, beta heat shock 90kDa protein 1, beta                              |
|            | 238                   | 2390.2  | 425.45  | AF352832        | MmugDNA.10102.1.S1_s_a | gDNA.g13273303 FEA=U133PSR GEN=HSPA8 DEF=Orthologous to 208687_x_at heat shock 70kDa protein 8                                                                  |
|            | 878.7                 | 6397.35 | 3740.95 | CO648366        | Mmu.156.2.S1_at        | gb:CO648366 DB_XREF=gi:50569860 DB_XREF=ILLUMIGEN_MCQ_41712 CLONE=IBIUW:24543 TID=Mmu.156.2 CNT=3 FEA=EST TIER=ConsEnd STK=0                                    |
|            | 226.15                | 1923.2  | 492.55  | -               | MmuSTS.602.1.S1_at     | gi:47776716 DEF=HSPA1A_124 Rhesus macaque genomic DNA Macaca mulatta STS genomic clone MMA124, sequence tagged site. GEN=HSPA1A PROD=heat shock 70kD protein 1A |
|            | 142.35                | 835.05  | 387.55  | AA043348        | MmugDNA.37971.1.S1_at  | gDNA.Hs.90093.2.S2 FEA=U133PSR GEN=HSPA4 DEF=Orthologous to 208814_at Heat shock 70kDa protein 4                                                                |
|            | 350.7                 | 2178.75 | 738.5   | NM_003299       | MmugDNA.6621.1.S1_at   | gDNA.g4507676 FEA=U133PSR GEN=TRA1 DEF=Orthologous to 200599_s_at tumor rejection antigen (gp96) 1                                                              |
|            | 247.4                 | 1469.8  | 577.05  | -               | MmuSTS.603.1.S1_at     | gi:47776717 DEF=HSPA1B_126 Rhesus macaque genomic DNA Macaca mulatta STS genomic clone MMA126, sequence tagged site. GEN=HSPA1B PROD=heat shock 70kD protein 1B |
|            | 156.95                | 709     | 363.8   | AI718418        | MmugDNA.23725.1.S1_at  | gDNA.Hs.288799.0.S2 FEA=U133PSR GEN=STCH DEF=Orthologous to 202557_at stress 70 protein chaperone, microsome-associated, 60kDa                                  |
|            | 49.95                 | 50.95   | 277.95  | NM_006948       | MmugDNA.25340.1.S1_at  | gDNA.g5902125 FEA=U133PSR GEN=STCH DEF=Orthologous to 202558_s_at stress 70 protein chaperone, microsome-associated, 60kDa                                      |
|            | 629.35                | 2657.25 | 1392.25 | NM_002156       | MmugDNA.19456.1.S1_at  | gDNA.g4504520 FEA=U133PSR GEN=HSPD1 DEF=Orthologous to 200807_s_at heat shock 60kDa protein 1 (chaperonin)                                                      |
|            | 2619.9                | 8581.7  | 6882.95 | AI218219        | MmugDNA.34686.1.S1_at  | gDNA.Hs.74335.1.S1 FEA=U133PSR GEN=HSPCB DEF=Orthologous to 214359_s_at heat shock 90kDa protein 1, beta                                                        |
|            | 31.2                  | 64.4    | 111.1   | L12723          | MmugDNA.4083.1.S1_s_a  | gDNA.g292159 FEA=U133PSR GEN=HSPA4 DEF=Orthologous to 211015_s_at heat shock 70kDa protein 4                                                                    |
|            | 90.65                 | 345     | 158.3   | AB023420        | MmugDNA.42100.1.S1_at  | gDNA.g4579908 FEA=U133PSR GEN=HSPA4 DEF=Orthologous to 208815_x_at heat shock 70kDa protein 4                                                                   |
|            | 324.55                | 1210.7  | 548.7   | NM_004134       | MmugDNA.28475.1.S1_at  | gDNA.g4758569 FEA=U133PSR GEN=HSPA9B DEF=Orthologous to 200692_s_at heat shock 70kDa protein 9B (mortalin-2)                                                    |
|            | 306.75                | 1177.55 | 431.85  | -               | MmuSTS.606.1.S1_at     | gi:47776720 DEF=HSPA5_988 Rhesus macaque genomic DNA Macaca mulatta STS genomic clone MMA988, sequence tagged site. GEN=HSPA5 PROD=heat shock 70kD protein 5    |
|            | 489.15                | 1451.7  | 1047.3  | AF133207        | MmugDNA.4113.1.S1_at   | gDNA.g5901654 FEA=U133PSR GEN=HSPB8 DEF=Orthologous to 221667_s_at heat shock 22kDa protein 8                                                                   |
|            | 150.5                 | 505.05  | 261.3   | BG403660        | MmugDNA.34111.1.S1_s_a | gDNA.Hs.36927.1.S1 FEA=U133PSR GEN=HSPH1 DEF=Orthologous to 208744_x_at heat shock 105kDa 110kDa protein 1                                                      |
|            | 823.85                | 2680.25 | 1136.65 | NM_001540       | MmugDNA.37672.1.S1_s_a | gDNA.g4996892 FEA=U133PSR GEN=HSPB1 DEF=Orthologous to 201841_s_at heat shock 27kDa protein 1                                                                   |
|            | 3298.5                | 8956.65 | 5590.05 | AL575922        | MmugDNA.34925.1.S1_at  | gDNA.Hs.111779.1.S1 FEA=U133PSR GEN=SPARC DEF=Orthologous to 212667_at secreted protein, acidic, cysteine-rich (osteonectin)                                    |
|            | 870.2                 | 2062.4  | 1300.15 | NM_001537       | MmugDNA.20456.1.S1_at  | gDNA.g4557646 FEA=U133PSR GEN=HSPB1 DEF=Orthologous to 200942_s_at heat shock factor binding protein 1                                                          |
|            | 578                   | 1203.3  | 1020.95 | NM_016126       | MmugDNA.15386.1.S1_s_a | gDNA.g7706382 FEA=U133PSR GEN=C1orf41 DEF=Orthologous to 203960_s_at chromosome 1 open reading frame 41                                                         |
|            | 1014.2                | 2538.5  | 1326.65 | NM_002157       | MmugDNA.19457.1.S1_s_a | gDNA.g4504522 FEA=U133PSR GEN=HSPB1 DEF=Orthologous to 205133_s_at heat shock 10kDa protein 1 (chaperonin 10)                                                   |
|            | 340.8                 | 723.1   | 500.4   | NM_012267       | MmugDNA.15176.1.S1_at  | gDNA.g6912423 FEA=U133PSR GEN=HSPBP1 DEF=Orthologous to 202415_s_at hsp70-interacting protein                                                                   |
|            | 668.5                 | 1533.8  | 822.75  | NM_012111       | MmugDNA.13760.1.S1_at  | gDNA.g6912279 FEA=U133PSR GEN=AHSA1 DEF=Orthologous to 201491_at AHA1, activator of heat shock 90kDa protein ATPase homolog 1 (yeast)                           |
|            | 988.7                 | 2296.5  | 1102.45 | NM_006644       | MmugDNA.14913.1.S1_at  | gDNA.g5729878 FEA=U133PSR GEN=HSPH1 DEF=Orthologous to 206976_s_at heat shock 105kDa 110kDa protein 1                                                           |
|            | 72.65                 | 145.9   | 20.75   | BE256479        | MmugDNA.36856.1.S1_at  | gDNA.Hs.79037.0.A1 FEA=U133PSR GEN=HSPD1 DEF=Orthologous to 200806_s_at heat shock 60kDa protein 1 (chaperonin)                                                 |
|            | 190.25                | 111.1   | 92.65   | NM_024610       | MmugDNA.11653.1.S1_at  | gDNA.g13375820 FEA=U133PSR GEN=HSPBAP1 DEF=Orthologous to 219284_at HSPB (heat shock 27kDa) associated protein 1                                                |
|            | 236.2                 | 107.7   | 130.4   | AI150641        | MmugDNA.37089.1.S1_at  | gDNA.Hs.11455.0.A1 FEA=U133PSR GEN=HSPA12B DEF=Orthologous to 229172_at heat shock 70kD protein 12B                                                             |
|            | 297.95                | 110.8   | 212.75  | NM_002155       | MmugDNA.25285.1.S1_at  | gDNA.Hs.3268.0.S1 FEA=U133PSR GEN=HSPA6 DEF=Orthologous to 213418_at heat shock 70kDa protein 6 (HSP70B)                                                        |
|            | 262.65                | 175.75  | 91.1    | AK001829        | MmugDNA.43136.1.S1_at  | gDNA.Hs.139119.0.S1 FEA=U133PSR DEF=Orthologous to 232594_at Hypothetical gene supported by AK001829                                                            |
