# Supplementary material
Source: PubMed Central journal article supplement (PMC4508249)
Supplement: NIHMS642757-supplement-4.pdf [file NIHMS642757-supplement-4.pdf]

Supplement 3. Probe sets for genes related to ubiquinases in serotonin neurons. All probe sets changed 2-fold or greater with E or E+P treatment compared to placebo treatment of OvX macaques.

| Search | Mean Signal Intensity |         |         | Gene Identifier | Other ID                | Gene Name                                                                                                                                                                 |
|--------|-----------------------|---------|---------|-----------------|-------------------------|---------------------------------------------------------------------------------------------------------------------------------------------------------------------------|
| UBE    | OvX                   | E       | E+P     |                 |                         |                                                                                                                                                                           |
|        | 67.5                  | 1514.35 | 762.3   | Z29331          | MmugDNA.29016.1.S1_at   | gDNA.Hs.28505.0.S3 FEA=U133PSR GEN=UBE2H DEF=Orthologous to 222420_s_at ubiquitin-conjugating enzyme E2H (UBC8 homolog, yeast)                                            |
|        | 23.6                  | 245     | 158.55  | AW662789        | MmugDNA.42377.1.S1_at   | gDNA.Hs.294136.0.A1 FEA=U133PSR GEN=UBE2D3 DEF=Orthologous to 230171_at Ubiquitin-conjugating enzyme E2D 3 (UBC4 5 homolog, yeast)                                        |
|        | 334.6                 | 2958.05 | 1416.5  | NM_003340       | MmugDNA.7415.1.S1_s_at  | gDNA.g4507776 FEA=U133PSR GEN=UBE2D3 DEF=Orthologous to 200669_s_at ubiquitin-conjugating enzyme E2D 3 (UBC4 5 homolog, yeast)                                            |
|        | 143.35                | 1311.25 | 402.75  | BC004862        | MmugDNA.38344.1.S1_at   | gDNA.g13436070 FEA=U133PSR GEN=UBE2R2 DEF=Orthologous to 223014_at ubiquitin-conjugating enzyme E2R 2                                                                     |
|        | 310.7                 | 1797.8  | 1156.1  | BC003395        | MmugDNA.6893.1.S1_at    | gDNA.g13097281 FEA=U133PSR GEN=UBE2D3 DEF=Orthologous to 200668_s_at ubiquitin-conjugating enzyme E2D 3 (UBC4 5 homolog, yeast)                                           |
|        | 77.35                 | 311.7   | 391.6   | AA160522        | MmugDNA.41426.1.S1_s_at | gDNA.Hs.301667.0.A1 FEA=U133PSR GEN=UBE3A DEF=Orthologous to 213291_s_at ubiquitin protein ligase E3A (human papilloma virus E6-associated protein, Angelman syndrome)    |
|        | 131.3                 | 612.65  | 353.85  | U62136          | MmugDNA.12795.1.S1_at   | gDNA.g4775663 FEA=U133PSR GEN=UBE2V2 DEF=Orthologous to 209096_at ubiquitin-conjugating enzyme E2 variant 2                                                               |
|        | 1089.6                | 4720.55 | 3063.75 | BF448062        | MmugDNA.179.1.S1_at     | gDNA.Hs.118797.0.A3 FEA=U133PSR GEN=UBE2D3 DEF=Orthologous to 200667_at ubiquitin-conjugating enzyme E2D 3 (UBC4 5 homolog, yeast)                                        |
|        | 173.35                | 584.2   | 401.05  | BC002775        | MmugDNA.24283.1.S1_at   | gDNA.g12803862 FEA=U133PSR GEN=UBE2G1 DEF=Orthologous to 209142_s_at ubiquitin-conjugating enzyme E2G 1 (UBC7 homolog, C. elegans)                                        |
|        | 535.35                | 1770.9  | 1001.55 | NM_004788       | MmugDNA.7059.1.S1_at    | gDNA.g4759287 FEA=U133PSR GEN=UBE4A DEF=Orthologous to 202038_at ubiquitination factor E4A (UFD2 homolog, yeast)                                                          |
|        | 383.6                 | 1309.25 | 666.8   | NM_017582       | MmugDNA.32489.1.S1_at   | gDNA.g8923743 FEA=U133PSR GEN=UBE2Q DEF=Orthologous to 217978_s_at ubiquitin-conjugating enzyme E2Q (putative)                                                            |
|        | 83                    | 204.35  | 221.85  | AL562528        | MmugDNA.16180.1.S1_at   | gDNA.Hs.184325.0.A3 FEA=U133PSR GEN=UBE2J1 DEF=Orthologous to 217823_s_at ubiquitin-conjugating enzyme E2, J1 (UBC6 homolog, yeast)                                       |
|        | 697.6                 | 2434.1  | 1112.9  | BG531983        | MmugDNA.35625.1.S1_s_at | gDNA.Hs.108104.0.S1 FEA=U133PSR GEN=UBE2L3 DEF=Orthologous to 200682_s_at ubiquitin-conjugating enzyme E2L 3                                                              |
|        | 355.15                | 1140.3  | 660     | -               | MmuSTS.4733.1.S1_at     | gi:60301518 DEF=UBE1C_8886 Rhesus macaque genomic DNA Macaca mulatta STS genomic clone MMA8886, sequence tagged site                                                      |
|        | 73.45                 | 148.85  | 211     | AW516242        | MmugDNA.17692.1.S1_s_at | gDNA.Hs.170737.0.A1 FEA=U133PSR GEN=UBE1DC1 DEF=Orthologous to 222578_s_at ubiquitin-activating enzyme E1-domain containing 1                                             |
|        | 278.95                | 474.6   | 861.9   | A1499236        | MmugDNA.2447.1.S1_at    | gDNA.Hs.811.1.A1 FEA=U133PSR GEN=UBE2B DEF=Orthologous to 228588_s_at ubiquitin-conjugating enzyme E2B (RAD6 homolog)                                                     |
|        | 79.15                 | 191.9   | 184.5   | BF679700        | MmugDNA.35416.1.S1_at   | gDNA.Hs.270366.0.A1 FEA=U133PSR GEN=UBE2D3 DEF=Orthologous to 243046_at Ubiquitin-conjugating enzyme E2D 3 (UBC4 5 homolog, yeast)                                        |
|        | 817.15                | 2207.5  | 1620.4  | AA877765        | MmugDNA.21931.1.S1_at   | gDNA.Hs.811.0.A1 FEA=U133PSR GEN=UBE2B DEF=Orthologous to 202333_s_at ubiquitin-conjugating enzyme E2B (RAD6 homolog)                                                     |
|        | 486.95                | 1371.15 | 834.05  | -               | MmuSTS.2001.1.S1_at     | gi:47155553 DEF=UBE2A_72 Rhesus macaque genomic DNA Macaca mulatta STS genomic clone MMA72, sequence tagged site. GEN=UBE2A PROD=ubiquitin-conjugating enzyme E2A         |
|        | 676.85                | 1820.45 | 1215.65 | AB017644        | MmugDNA.40739.1.S1_at   | gDNA.g4586929 FEA=U133PSR GEN=UBE2E3 DEF=Orthologous to 210024_s_at ubiquitin-conjugating enzyme E2E 3 (UBC4 5 homolog, yeast)                                            |
|        | 334.95                | 1110.35 | 375     | -               | MmuSTS.974.1.S1_at      | gi:53828483 DEF=UBE2L3_3884 Rhesus macaque genomic DNA Macaca mulatta STS genomic clone MMA3884, sequence tagged site. GEN=UBE2L3 PROD=ubiquitin-conjugating enzyme E2L 3 |
|        | 664.6                 | 1733.3  | 1177.55 | AL518159        | MmugDNA.30183.1.S1_at   | gDNA.Hs.7766.0.A2 FEA=U133PSR GEN=UBE2E1 DEF=Orthologous to 212519_at ubiquitin-conjugating enzyme E2E 1 (UBC4 5 homolog, yeast)                                          |
|        | 622.8                 | 1974.85 | 740.95  | NM_003334       | MmugDNA.7386.1.S1_at    | gDNA.g4507762 FEA=U133PSR GEN=UBE1 DEF=Orthologous to 200964_at ubiquitin-activating enzyme E1 (A1S9T and BN75 temperature sensitivity complementing)                     |
|        | 553.3                 | 1393.25 | 999.35  | BG290646        | MmugDNA.9787.1.S1_s_at  | gDNA.Hs.75355.1.A1 FEA=U133PSR GEN=UBE2N DEF=Orthologous to 212751_at ubiquitin-conjugating enzyme E2N (UBC13 homolog, yeast)                                             |
|        | 274.5                 | 649.6   | 535.85  | AW299555        | MmugDNA.37118.1.S1_at   | gDNA.Hs.78563.0.A3 FEA=U133PSR GEN=UBE2G1 DEF=Orthologous to 209141_at ubiquitin-conjugating enzyme E2G 1 (UBC7 homolog, C. elegans)                                      |
|        | 615.5                 | 1484.85 | 1124.8  | -               | MmuSTS.4687.1.S1_at     | gi:47777228 DEF=UBE2D2_1119 Rhesus macaque genomic DNA Macaca mulatta STS genomic clone MMA1119, sequence tagged site. GEN=UBE2D2 PROD=ubiquitin-conjugating enzyme E2D 2 |
|        | 139.55                | 368.55  | 205.6   | BE221883        | MmugDNA.41419.1.S1_at   | gDNA.Hs.66817.0.A1 FEA=U133PSR GEN=UBE2R2 DEF=Orthologous to 226954_at Ubiquitin-conjugating enzyme E2R 2                                                                 |
|        | 249.8                 | 697.9   | 302.35  | NM_003922       | MmugDNA.15633.1.S1_at   | gDNA.g4557025 FEA=U133PSR GEN=HERC1 DEF=Orthologous to 218306_s_at hect (homologous to the E6-AP (UBE3A) carboxyl terminus) domain and RCC1 (CHC1)-like domain (RLD) 1    |
|        | 61.75                 | 73.75   | 169.25  | NM_016021       | MmugDNA.15202.1.S1_at   | gDNA.g7706311 FEA=U133PSR GEN=UBE2J1 DEF=Orthologous to 217826_s_at ubiquitin-conjugating enzyme E2, J1 (UBC6 homolog, yeast)                                             |
|        | 170.6                 | 352.95  | 301.65  | BE783065        | MmugDNA.11900.1.S1_at   | gDNA.Hs.22543.0.S1 FEA=U133PSR GEN=UBE3A DEF=Orthologous to 226587_at Ubiquitin protein ligase E3A (human papilloma virus E6-associated protein, Angelman syndrome)       |
|        | 458.95                | 1243.95 | 468.8   | BF435617        | MmugDNA.29018.1.S1_at   | gDNA.Hs.28505.0.S4 FEA=U133PSR GEN=UBE2H DEF=Orthologous to 222421_at ubiquitin-conjugating enzyme E2H (UBC8 homolog, yeast)                                              |
|        | 413.75                | 999.9   | 539.7   | NM_006048       | MmugDNA.36546.1.S1_at   | gDNA.g5174482 FEA=U133PSR GEN=UBE4B DEF=Orthologous to 202317_s_at ubiquitination factor E4B (UFD2 homolog, yeast)                                                        |
|        | 148.3                 | 354.8   | 181.75  | BE964689        | MmugDNA.35627.1.S1_at   | gDNA.Hs.108104.0.S2 FEA=U133PSR GEN=UBE2L3 DEF=Orthologous to 200683_s_at ubiquitin-conjugating enzyme E2L 3                                                              |
|        | 581.55                | 1218.4  | 776.8   | -               | MmuSTS.2901.1.S1_at     | gi:51854190 DEF=UBE2L_3883 Rhesus macaque genomic DNA Macaca mulatta STS genomic clone MMA3883, sequence tagged site. GEN=UBE2L PROD=ubiquitin-conjugating enzyme E2L     |
|        | 719.5                 | 1546.15 | 918.6   | BE621259        | MmugDNA.4956.1.S1_at    | gDNA.Hs.108332.0.S2 FEA=U133PSR GEN=UBE2D2 DEF=Orthologous to 201343_at ubiquitin-conjugating enzyme E2D 2 (UBC4 5 homolog, yeast)                                        |
|        | 997.45                | 2294.05 | 1090.25 | U39381          | MmugDNA.7908.1.S1_at    | gDNA.g1066081 FEA=U133PSR GEN=UBE2V1 Kua-UEV DEF=Orthologous to 201002_s_at ubiquitin-conjugating enzyme E2 variant 1                                                     |
|        | 269.45                | 569.35  | 283.75  | NM_004223       | MmugDNA.7052.1.S1_at    | gDNA.g4759281 FEA=U133PSR GEN=UBE2L6 DEF=Orthologous to 201649_at ubiquitin-conjugating enzyme E2L 6                                                                      |
|        | 121.4                 | 357.35  | 73.25   | A1459177        | MmugDNA.35956.1.S1_at   | gDNA.Hs.172759.0.A1 FEA=U133PSR GEN=UBE2D3 DEF=Orthologous to 242403_at Ubiquitin-conjugating enzyme E2D 3 (UBC4 5 homolog, yeast)                                        |
|        | 282.95                | 572     | 260.7   | AC005600        | MmugDNA.573.1.S1_at     | gDNA.Hs.90303.2.S1 FEA=U133PSR GEN=TSC2 DEF=Orthologous to 215735_s_at tuberous sclerosis 2                                                                               |
|        | 167.05                | 170.3   | 82.7    | NM_014501       | MmugDNA.15298.1.S1_at   | gDNA.g7657045 FEA=U133PSR GEN=UBE2S DEF=Orthologous to 202779_s_at ubiquitin-conjugating enzyme E2S                                                                       |
|        | 258.6                 | 190.25  | 121.15  | A1800998        | MmugDNA.18540.1.S1_at   | gDNA.Hs.43569.0.A1 FEA=U133PSR GEN=UBE2V2 DEF=Orthologous to 230411_at Ubiquitin-conjugating enzyme E2 variant 2                                                          |
|        | 241                   | 50.15   | 313.8   | AA250831        | MmugDNA.18053.1.S1_at   | gDNA.Hs.87757.0.A1 FEA=U133PSR GEN=UBE3A DEF=Orthologous to 243855_at Ubiquitin protein ligase E3A (human papilloma virus E6-associated protein, Angelman syndrome)       |
|        | 209.8                 | 155.3   | 97.2    | AW779859        | MmugDNA.22609.1.S1_at   | gDNA.Hs.284233.0.S2 FEA=U133PSR GEN=UBE2Q DEF=Orthologous to 222480_at ubiquitin-conjugating enzyme E2Q (putative)                                                        |
|        | 464.65                | 372.1   | 192.5   | BC035653        | MmugDNA.37414.1.S1_s_at | gDNA.Hs2.406136.1.A1 FEA=U133PSR GEN=UBE2G2 DEF=Orthologous to 1557053_s_at ubiquitin-conjugating enzyme E2G 2 (UBC7 homolog, yeast)                                      |
|        | 540.6                 | 328.95  | 266.55  | AL121873        | MmugDNA.9196.1.S1_s_at  | gDNA.Hs.283845.0.S1 FEA=U133PSR GEN=UBE2V1 Kua-UEV DEF=Orthologous to 216315_x_at ubiquitin-conjugating enzyme E2 variant 1                                               |
|        | 401.5                 | 181.2   | 188.5   | AW364833        | MmugDNA.27810.1.S1_at   | gDNA.Hs.165681.0.A1 FEA=U133PSR GEN=UBE2B DEF=Orthologous to 239163_at ubiquitin-conjugating enzyme E2B (RAD6 homolog)                                                    |
|        | 358.15                | 209.95  | 68.9    | AW500009        | MmugDNA.16183.1.S1_at   | gDNA.Hs.184325.0.A5 FEA=U133PSR GEN=UBE2J1 DEF=Orthologous to 217824_at ubiquitin-conjugating enzyme E2, J1 (UBC6 homolog, yeast)                                         |
|        | 510.65                | 60.55   | 330.05  | AU146791        | MmugDNA.14362.1.S1_at   | gDNA.Hs.287474.0.S1 FEA=U133PSR GEN=UBE2E1 DEF=Orthologous to 215577_at Ubiquitin-conjugating enzyme E2E 1 (UBC4 5 homolog, yeast)                                        |
|        | 251.95                | 15.05   | 236.55  | AF258566        | MmugDNA.21374.1.S1_at   | gDNA.Hs2Afxf.1.256.S1 FEA=U133PSR GEN=UBE1 DEF=Orthologous to 1555387_at ubiquitin-activating enzyme E1 (A1S9T and BN75 temperature sensitivity complementing)            |
