# Supplementary material
Source: PubMed Central journal article supplement (PMC4508249)
Supplement: NIHMS642757-supplement-5.pdf [file NIHMS642757-supplement-5.pdf]

**Supplement 4. Probe sets for genes related to axonal transport genes in serotonin neurons. All probe sets changed 2-fold or greater with E or E+P treatment compared to placebo**

| Search           | Mean Signal Intensity                                 |         | Gene Identifier | Other ID                | Gene Name                                                                                                                                              |                                                                                                                                                        |                                                                                                                                      |
|------------------|-------------------------------------------------------|---------|-----------------|-------------------------|--------------------------------------------------------------------------------------------------------------------------------------------------------|--------------------------------------------------------------------------------------------------------------------------------------------------------|--------------------------------------------------------------------------------------------------------------------------------------|
| <b>Axon car:</b> | 206.5                                                 | 1948    | 741             | NM_004181               | MmugDNA.7056.1.S1_at                                                                                                                                   | gDNA.g4759283 FEA=U133PSR GEN=UCHL1 DEF=Orthologous to 201387_s_at ubiquitin carboxyl-terminal esterase L1 (ubiquitin thiolesterase)                   |                                                                                                                                      |
|                  | 46.25                                                 | 242.75  | 164.6           | BG473130                | MmugDNA.1261.1.S1_at                                                                                                                                   | gDNA.Hs.259873.0.S1 FEA=U133PSR GEN=KIF1A DEF=Orthologous to 203849_s_at kinesin family member 1A                                                      |                                                                                                                                      |
|                  | 458.2                                                 | 2443.75 | 883.6           | NM_000430               | MmugDNA.30079.1.S1_at                                                                                                                                  | gDNA.g6031206 FEA=U133PSR GEN=PAFAH1B1 DEF=Orthologous to 200816_s_at platelet-activating factor acetylhydrolase, isoform I, alpha subunit 45kDa       |                                                                                                                                      |
|                  | 624.6                                                 | 2499.05 | 1408            | AL566528                | MmugDNA.136.1.S1_at                                                                                                                                    | gDNA.Hs.211584.0.A3 FEA=U133PSR GEN=NEFL DEF=Orthologous to 221801_x_at neurofilament, light polypeptide 68kDa                                         |                                                                                                                                      |
|                  | 716.5                                                 | 2571.9  | 1775            | NM_005382               | MmugDNA.33139.1.S1_at                                                                                                                                  | gDNA.g4885512 FEA=U133PSR GEN=NEF3 DEF=Orthologous to 205113_at neurofilament 3 (150kDa medium)                                                        |                                                                                                                                      |
|                  | 210.9                                                 | 930.55  | 310.6           | AI197374                | MmugDNA.10001.1.S1_at                                                                                                                                  | gDNA.Hs.301206.0.A1 FEA=U133PSR GEN=KIF3B DEF=Orthologous to 225205_at kinesin family member 3B                                                        |                                                                                                                                      |
|                  | 967.5                                                 | 3314.35 | 1915            | BF939474                | MmugDNA.13708.1.S1_at                                                                                                                                  | gDNA.Hs.129908.0.A2 FEA=U133PSR GEN=KIF1B DEF=Orthologous to 209234_at kinesin family member 1B                                                        |                                                                                                                                      |
|                  | 172.5                                                 | 580.45  | 330.5           | NM_003119               | MmugDNA.2782.1.S1_at                                                                                                                                   | gDNA.g4507172 FEA=U133PSR GEN=SPG7 DEF=Orthologous to 202104_s_at spastic paraplegia 7, paraplegin (pure and complicated autosomal recessive)          |                                                                                                                                      |
|                  | 440.4                                                 | 1182.1  | 505.9           | AL135284                | MmugDNA.39479.1.S1_at                                                                                                                                  | gDNA.Hs.14434.0.A1 FEA=U133PSR GEN=KIF1B DEF=Orthologous to 225878_at kinesin family member 1B                                                         |                                                                                                                                      |
|                  | 4088                                                  | 8395.2  | 5754            | AL566528                | MmugDNA.136.1.S1_s_at                                                                                                                                  | gDNA.Hs.211584.0.A3 FEA=U133PSR GEN=NEFL DEF=Orthologous to 221801_x_at neurofilament, light polypeptide 68kDa                                         |                                                                                                                                      |
|                  | 300.9                                                 | 759.5   | 285.3           | NM_0041139              | MmugDNA.1866.1.S1_at                                                                                                                                   | gDNA.Hs.147946.0.S2 FEA=U133PSR GEN=OPA1 DEF=Orthologous to 212213_x_at optic atrophy 1 (autosomal dominant)                                           |                                                                                                                                      |
|                  | 422.7                                                 | 1043.1  | 409.4           | BE256969                | MmugDNA.24123.1.S1_at                                                                                                                                  | gDNA.Hs.77318.0.A2 FEA=U133PSR GEN=PAFAH1B1 DEF=Orthologous to 200813_s_at platelet-activating factor acetylhydrolase, isoform II, alpha subunit 45kDa |                                                                                                                                      |
|                  | 422.1                                                 | 965.55  | 406.1           | NM_005200               | MmugDNA.24516.1.S1_s_at                                                                                                                                | gDNA.Hs.272480.0.S1 FEA=U133PSR GEN=SPG7 DEF=Orthologous to 214494_s_at spastic paraplegia 7, paraplegin (pure and complicated autosomal recessive)    |                                                                                                                                      |
|                  | 674.8                                                 | 313.2   | 767.1           | NM_022822               | MmugDNA.26537.1.S1_at                                                                                                                                  | gDNA.g12383061 FEA=U133PSR GEN=KLC2 DEF=Orthologous to 218906_x_at likely ortholog of kinesin light chain 2                                            |                                                                                                                                      |
|                  | 193.7                                                 | 248.5   | 35.75           | NM_004798               | MmugDNA.29117.1.S1_s_at                                                                                                                                | gDNA.g4758645 FEA=U133PSR GEN=KIF3B DEF=Orthologous to 203943_at kinesin family member 3B                                                              |                                                                                                                                      |
|                  | 15596                                                 | 4570.5  | 8352            | BC004369                | MmugDNA.36988.1.S1_x_at                                                                                                                                | gDNA.g13325111 FEA=U133PSR GEN=APP DEF=Orthologous to 211277_x_at amyloid beta (A4) precursor protein (protease nexin-II, Alzheimer disease)           |                                                                                                                                      |
|                  | <b>cytoskeletal-dependent intracellular transport</b> | 37      | 508.45          | 225.1                   | AI805050                                                                                                                                               | MmugDNA.35068.1.S1_at                                                                                                                                  | gDNA.Hs.89981.3.A1 FEA=U133PSR GEN=RAB6B DEF=Orthologous to 225269_at RAB6B, member RAS oncogene family                              |
|                  |                                                       | 206.5   | 1948            | 741                     | NM_004181                                                                                                                                              | MmugDNA.7056.1.S1_at                                                                                                                                   | gDNA.g4759283 FEA=U133PSR GEN=UCHL1 DEF=Orthologous to 201387_s_at ubiquitin carboxyl-terminal esterase L1 (ubiquitin thiolesterase) |
|                  |                                                       | 999.3   | 7049.35         | 4582                    | BF223224                                                                                                                                               | MmugDNA.8525.1.S1_at                                                                                                                                   | gDNA.Hs.149436.0.A1 FEA=U133PSR GEN=KIF5B DEF=Orthologous to 201991_s_at kinesin family member 5B                                    |
|                  |                                                       | 46.25   | 242.75          | 164.6                   | BG473130                                                                                                                                               | MmugDNA.1261.1.S1_at                                                                                                                                   | gDNA.Hs.259873.0.S1 FEA=U133PSR GEN=KIF1A DEF=Orthologous to 203849_s_at kinesin family member 1A                                    |
|                  |                                                       | 59.2    | 342.95          | 155.8                   | NM_020153                                                                                                                                              | MmugDNA.16369.1.S1_at                                                                                                                                  | gDNA.g9910357 FEA=U133PSR GEN=FLJ21827 DEF=Orthologous to 218483_s_at hypothetical protein FLJ21827                                  |
|                  |                                                       | 154.8   | 760.85          | 414.2                   | NM_004182                                                                                                                                              | MmugDNA.7088.1.S1_at                                                                                                                                   | gDNA.g4759297 FEA=U133PSR GEN=LUXT DEF=Orthologous to 218495_at ubiquitously-expressed transcript                                    |
| 458.2            |                                                       | 2443.75 | 883.6           | NM_000430               | MmugDNA.30079.1.S1_at                                                                                                                                  | gDNA.g6031206 FEA=U133PSR GEN=PAFAH1B1 DEF=Orthologous to 200816_s_at platelet-activating factor acetylhydrolase, isoform II, alpha subunit 45kDa      |                                                                                                                                      |
| 126              |                                                       | 644.6   | 145.6           | AI653608                | MmugDNA.39791.1.S1_at                                                                                                                                  | gDNA.Hs.182490.0.S1 FEA=U133PSR GEN=LRRPCC DEF=Orthologous to 211971_s_at leucine-rich PPR-motif containing                                            |                                                                                                                                      |
| 624.6            |                                                       | 2499.05 | 1408            | AL566528                | MmugDNA.136.1.S1_at                                                                                                                                    | gDNA.Hs.211584.0.A3 FEA=U133PSR GEN=NEFL DEF=Orthologous to 221801_x_at neurofilament, light polypeptide 68kDa                                         |                                                                                                                                      |
| 716.5            |                                                       | 2571.9  | 1775            | NM_005382               | MmugDNA.33139.1.S1_at                                                                                                                                  | gDNA.g4885512 FEA=U133PSR GEN=NEF3 DEF=Orthologous to 205113_at neurofilament 3 (150kDa medium)                                                        |                                                                                                                                      |
| 577.9            |                                                       | 2515.1  | 925.5           | AW118072                | MmugDNA.35069.1.S1_at                                                                                                                                  | gDNA.Hs.89981.3.A2 FEA=U133PSR GEN=RAB6B DEF=Orthologous to 221792_at RAB6B, member RAS oncogene family                                                |                                                                                                                                      |
| 210.9            |                                                       | 930.55  | 310.6           | AI197374                | MmugDNA.10001.1.S1_at                                                                                                                                  | gDNA.Hs.301206.0.A1 FEA=U133PSR GEN=KIF3B DEF=Orthologous to 225205_at kinesin family member 3B                                                        |                                                                                                                                      |
| 33.65            |                                                       | 125.45  | 69.15           | NM_004521               | MmugDNA.29118.1.S1_at                                                                                                                                  | gDNA.g4758647 FEA=U133PSR GEN=KIF5B DEF=Orthologous to 201992_s_at kinesin family member 5B                                                            |                                                                                                                                      |
| 118              |                                                       | 360.8   | 257.9           | BF688108                | MmugDNA.20017.1.S1_at                                                                                                                                  | gDNA.Hs.14202.2.S1 FEA=U133PSR GEN=RHOT1 DEF=Orthologous to 222148_s_at Ras homolog gene family, member T1                                             |                                                                                                                                      |
| 202.2            |                                                       | 665.3   | 439.9           | AI341076                | MmugDNA.8919.1.S1_at                                                                                                                                   | gDNA.Hs.54310.0.A1 FEA=U133PSR GEN=LRRPCC DEF=Orthologous to 203194_at Leucine-rich PPR-motif containing                                               |                                                                                                                                      |
| 967.5            |                                                       | 3314.35 | 1915            | BF939474                | MmugDNA.13708.1.S1_at                                                                                                                                  | gDNA.Hs.129908.0.A2 FEA=U133PSR GEN=KIF1B DEF=Orthologous to 209234_at kinesin family member 1B                                                        |                                                                                                                                      |
| 172.5            |                                                       | 580.45  | 330.5           | NM_003119               | MmugDNA.2782.1.S1_at                                                                                                                                   | gDNA.g4507172 FEA=U133PSR GEN=SPG7 DEF=Orthologous to 202104_s_at spastic paraplegia 7, paraplegin (pure and complicated autosomal recessive)          |                                                                                                                                      |
| 402.9            |                                                       | 1372.5  | 579.3           | M92439                  | MmugDNA.34357.1.S1_s_at                                                                                                                                | gDNA.g177109 FEA=U133PSR GEN=LRRPCC DEF=Orthologous to 211615_s_at leucine-rich PPR-motif containing leucine-rich PPR-motif containing                 |                                                                                                                                      |
| 399              |                                                       | 1145.7  | 711.7           | NM_0104970              | MmugDNA.19383.1.S1_at                                                                                                                                  | gDNA.g7657592 FEA=U133PSR GEN=KIFAP3 DEF=Orthologous to 203333_at kinesin-associated protein 3                                                         |                                                                                                                                      |
| 440.4            |                                                       | 1182.1  | 505.9           | AL135284                | MmugDNA.39479.1.S1_at                                                                                                                                  | gDNA.Hs.14434.0.A1 FEA=U133PSR GEN=KIF1B DEF=Orthologous to 225878_at kinesin family member 1B                                                         |                                                                                                                                      |
| 104.7            |                                                       | 2508.5  | 1465            | NM_018307               | MmugDNA.8301.1.S1_at                                                                                                                                   | gDNA.g8922837 FEA=U133PSR GEN=RHOT1 DEF=Orthologous to 218323_at Ras homolog gene family, member T1                                                    |                                                                                                                                      |
| 313.2            |                                                       | 689.35  | 409.5           | CA777994                | MmugDNA.17946.1.S1_s_at                                                                                                                                | gDNA.Hs.2.164975.3.A1 FEA=U133PSR GEN=BICD1 DEF=Orthologous to 1556051_s_at bicaudal D homolog 1 (Drosophila)                                          |                                                                                                                                      |
| 4088             | 8395.2                                                | 5754    | AL566528        | MmugDNA.136.1.S1_s_at   | gDNA.Hs.211584.0.A3 FEA=U133PSR GEN=NEFL DEF=Orthologous to 221801_x_at neurofilament, light polypeptide 68kDa                                         |                                                                                                                                                        |                                                                                                                                      |
| 300.9            | 759.5                                                 | 285.3   | NM_0041139      | MmugDNA.1866.1.S1_at    | gDNA.Hs.147946.0.S2 FEA=U133PSR GEN=OPA1 DEF=Orthologous to 212213_x_at optic atrophy 1 (autosomal dominant)                                           |                                                                                                                                                        |                                                                                                                                      |
| 422.7            | 1043.1                                                | 409.4   | BE256969        | MmugDNA.24123.1.S1_at   | gDNA.Hs.77318.0.A2 FEA=U133PSR GEN=PAFAH1B1 DEF=Orthologous to 200813_s_at platelet-activating factor acetylhydrolase, isoform II, alpha subunit 45kDa |                                                                                                                                                        |                                                                                                                                      |
| 422.1            | 965.55                                                | 406.1   | NM_005200       | MmugDNA.24516.1.S1_s_at | gDNA.Hs.272480.0.S1 FEA=U133PSR GEN=SPG7 DEF=Orthologous to 214494_s_at spastic paraplegia 7, paraplegin (pure and complicated autosomal recessive)    |                                                                                                                                                        |                                                                                                                                      |
| 674.8            | 313.2                                                 | 767.1   | NM_022822       | MmugDNA.26537.1.S1_at   | gDNA.g12383061 FEA=U133PSR GEN=KLC2 DEF=Orthologous to 218906_x_at likely ortholog of kinesin light chain 2                                            |                                                                                                                                                        |                                                                                                                                      |
| 193.7            | 248.5                                                 | 35.75   | NM_004798       | MmugDNA.29117.1.S1_s_at | gDNA.g4758645 FEA=U133PSR GEN=KIF3B DEF=Orthologous to 203943_at kinesin family member 3B                                                              |                                                                                                                                                        |                                                                                                                                      |
| 455.1            | 143.7                                                 | 317.6   | BC012504        | MmugDNA.35280.1.S1_at   | gDNA.Hs2.383134.1.S1 FEA=U133PSR GEN=DNHC1 DEF=Orthologous to 1569843_at dynein, cytoplasmic, intermediate polypeptide 1                               |                                                                                                                                                        |                                                                                                                                      |
| 15596            | 4570.5                                                | 8352    | BC004369        | MmugDNA.36988.1.S1_x_at | gDNA.g13325111 FEA=U133PSR GEN=APP DEF=Orthologous to 211277_x_at amyloid beta (A4) precursor protein (protease nexin-II, Alzheimer disease)           |                                                                                                                                                        |                                                                                                                                      |
| <b>dynactin</b>  | 486.1                                                 | 1835.8  | 1158            | NM_006571               | MmugDNA.34757.1.S1_s_at                                                                                                                                | gDNA.g5730115 FEA=U133PSR GEN=DCTN6 DEF=Orthologous to 203261_at dynactin 6                                                                            |                                                                                                                                      |
|                  | 299.2                                                 | 1003.55 | 579.9           | BE218028                | MmugDNA.3795.1.S1_at                                                                                                                                   | gDNA.Hs.180952.0.A2 FEA=U133PSR GEN=DCTN4 DEF=Orthologous to 222488_s_at dynactin 4 (p62)                                                              |                                                                                                                                      |
|                  | 114.3                                                 | 183.6   | 238.8           | BC004191                | MmugDNA.6161.1.S1_at                                                                                                                                   | gDNA.g13278857 FEA=U133PSR GEN=MGC3248 DEF=Orthologous to 209232_s_at dynactin 4                                                                       |                                                                                                                                      |
|                  | 897.1                                                 | 2077.15 | 1181            | AI985890                | MmugDNA.9774.1.S1_s_at                                                                                                                                 | gDNA.Hs.180952.2.A1 FEA=U133PSR GEN=DCTN4 DEF=Orthologous to 233490_at Dynactin 4 (p62)                                                                |                                                                                                                                      |
|                  | 499.1                                                 | 1147.3  | 501.9           | NM_007234               | MmugDNA.14686.1.S1_s_at                                                                                                                                | gDNA.g13259516 FEA=U133PSR GEN=DCTN3 DEF=Orthologous to 204246_s_at dynactin 3 (p22)                                                                   |                                                                                                                                      |
|                  | 1116                                                  | 2281.15 | 886.4           | NM_006400               | MmugDNA.14660.1.S1_at                                                                                                                                  | gDNA.g13259506 FEA=U133PSR GEN=DCTN2 DEF=Orthologous to 200932_s_at dynactin 2 (p50)                                                                   |                                                                                                                                      |
|                  | <b>dynein</b>                                         | 142.1   | 2283.3          | 826.6                   | CK230640                                                                                                                                               | Mmu.14082.1.S1_at                                                                                                                                      | gb:CK230640 DB_XREF=gi:39636821 DB_XREF=ILLUMIGEN_MCO_991 TID=Mmu.14082.1 CNT=5 FEA=EST TIER=ConsEnd STK=0                           |
|                  |                                                       | 31.65   | 338.8           | 128.7                   | BF000332                                                                                                                                               | MmugDNA.23886.1.S1_at                                                                                                                                  | gDNA.Hs.7720.0.A1 FEA=U133PSR GEN=DNCH1 DEF=Orthologous to 229115_at dynein, cytoplasmic, heavy polypeptide 1                        |
|                  |                                                       | 88.35   | 739.5           | 512.6                   | AK026653                                                                                                                                               | MmugDNA.6787.1.S1_at                                                                                                                                   | gDNA.Hs.7086.1.S1 FEA=U133PSR GEN=C14orf168 DEF=Orthologous to 228309_at chromosome 14 open reading frame 168                        |
|                  |                                                       | 199.2   | 1112            | 706.4                   | AK024863                                                                                                                                               | MmugDNA.27200.1.S1_at                                                                                                                                  | gDNA.Hs.325093.0.A1 FEA=U133PSR GEN=DNCL2 DEF=Orthologous to 224614_at dynein, cytoplasmic, light intermediate polypeptide 2         |
|                  |                                                       | 992.6   | 5689.8          | 3015                    | NM_014183                                                                                                                                              | MmugDNA.33113.1.S1_at                                                                                                                                  | gDNA.g7661821 FEA=U133PSR GEN=DNCL2A DEF=Orthologous to 217917_s_at dynein, cytoplasmic, light polypeptide 2A                        |
| 168.4            |                                                       | 392.7   | 472.5           | BF920008                | MmugDNA.19684.1.S1_at                                                                                                                                  | gDNA.Hs.87372.1.S1 FEA=U133PSR GEN=DNDC2 DEF=Orthologous to 242363_at dynein, cytoplasmic, intermediate polypeptide 2                                  |                                                                                                                                      |
| 150.9            |                                                       | 447.3   | 282.9           | CB311093                | Mmu.3811.1.S1_at                                                                                                                                       | gb:CB311093 DB_XREF=gi:28833807 DB_XREF=AGENECOURT_11837347 CLONE=IMAGE:6916605 TID=Mmu.3811.1 CNT=4 FEA=EST TIER=ConsEnd STK=0                        |                                                                                                                                      |
| 1479             |                                                       | 4101.7  | 2584            | BG110975                | MmugDNA.27201.1.S1_at                                                                                                                                  | gDNA.Hs.325093.0.A2 FEA=U133PSR GEN=DNCL2 DEF=Orthologous to 224616_at dynein, cytoplasmic, light intermediate polypeptide 2                           |                                                                                                                                      |
| 433.2            |                                                       | 1023.6  | 871.3           | NM_006519               | MmugDNA.34145.1.S1_at                                                                                                                                  | gDNA.g5730084 FEA=U133PSR GEN=TCCTE1 DEF=Orthologous to 201990_s_at t-complex-associated-testis-expressed 1-like 1                                     |                                                                                                                                      |
| 3079             |                                                       | 7599.9  | 5676            | NM_006141               | MmugDNA.19273.1.S1_at                                                                                                                                  | gDNA.g5453633 FEA=U133PSR GEN=DNCL2 DEF=Orthologous to 203590_at dynein, cytoplasmic, light intermediate polypeptide 2                                 |                                                                                                                                      |
| 797.5            |                                                       | 2080    | 1181            | AF250307                | MmugDNA.41136.1.S1_at                                                                                                                                  | gDNA.g13649464 FEA=U133PSR GEN=DNDC2 DEF=Orthologous to 211684_s_at dynein, cytoplasmic, intermediate polypeptide 2                                    |                                                                                                                                      |
| 892.6            |                                                       | 2091    | 1380            | NM_006520               | MmugDNA.34151.1.S1_at                                                                                                                                  | gDNA.g5730086 FEA=U133PSR GEN=TCCTE1 DEF=Orthologous to 203303_at t-complex-associated-testis-expressed 1-like                                         |                                                                                                                                      |
| 4432             |                                                       | 10043.3 | 7009            | NM_003746               | MmugDNA.2252.1.S1_at                                                                                                                                   | gDNA.g4505812 FEA=U133PSR GEN=DNCL1 DEF=Orthologous to 200703_at dynein, cytoplasmic, light polypeptide 1                                              |                                                                                                                                      |
| 205.6            |                                                       | 285.2   | 428.6           | NM_024606               | MmugDNA.11626.1.S1_at                                                                                                                                  | gDNA.g13375812 FEA=U133PSR GEN=DNCH2 DEF=Orthologous to 219469_at dynein, cytoplasmic, heavy polypeptide 2                                             |                                                                                                                                      |
| 772.3            |                                                       | 353.65  | 413.4           | NM_012192               | MmugDNA.14592.1.S1_at                                                                                                                                  | gDNA.g6912381 FEA=U133PSR GEN=FXC1 DEF=Orthologous to 217981_s_at fracture callus 1 homolog (rat)                                                      |                                                                                                                                      |
| 359.7            |                                                       | 114.9   | 329.8           | AI986267                | MmugDNA.7110.1.S1_at                                                                                                                                   | gDNA.Hs2.376169.1.S1 FEA=U133PSR GEN=DNCH1 DEF=Orthologous to 1556831_at Dynein, cytoplasmic, heavy polypeptide 1                                      |                                                                                                                                      |
| 455.1            |                                                       | 143.7   | 317.6           | BC012504                | MmugDNA.35280.1.S1_at                                                                                                                                  | gDNA.Hs2.383134.1.S1 FEA=U133PSR GEN=DNHC1 DEF=Orthologous to 1569843_at dynein, cytoplasmic, intermediate polypeptide 1                               |                                                                                                                                      |
| 263.4            |                                                       | 76.15   | 205.6           | AI005163                | MmugDNA.24258.1.S1_at                                                                                                                                  | gDNA.Hs.201378.0.A1 FEA=U133PSR GEN=FLJ40427 DEF=Orthologous to 243802_at hypothetical protein FLJ40427                                                |                                                                                                                                      |
| 474              |                                                       | 93.3    | 327.5           | AI076810                | MmugDNA.35712.1.S1_at                                                                                                                                  | gDNA.Hs.133977.0.A1 FEA=U133PSR GEN=MGC27277 DEF=Orthologous to 242283_at hypothetical protein MGC27277                                                |                                                                                                                                      |
| 378.7            |                                                       | 56.4    | 361.1           | AI821235                | MmugDNA.10048.1.S1_at                                                                                                                                  | gDNA.Hs.187802.0.A1 FEA=U133PSR GEN=DNAH11 DEF=Orthologous to 241246_at Dynein, axonemal, heavy polypeptide 11                                         |                                                                                                                                      |
| 251.9            |                                                       | 67.15   | 61.9            | NM_003462               | MmugDNA.22105.1.S1_at                                                                                                                                  | gDNA.g13518030 FEA=U133PSR GEN=DNAL1 DEF=Orthologous to 205186_at dynein, axonemal, light intermediate polypeptide 1                                   |                                                                                                                                      |
| 268.1            |                                                       | 69.65   | 64.55           | AI823600                | MmugDNA.38210.1.S1_at                                                                                                                                  | gDNA.Hs.87372.0.A1 FEA=U133PSR GEN=DNDC2 DEF=Orthologous to 236698_at Dynein, cytoplasmic, intermediate polypeptide 2                                  |                                                                                                                                      |
| 228.9            | 20.2                                                  | 85.95   | AL512706        | MmugDNA.33414.1.S1_at   | gDNA.Hs.246306.0.S1 FEA=U133PSR GEN=FLJ23529 DEF=Orthologous to 234893_s_at hypothetical protein FLJ23529                                              |                                                                                                                                                        |                                                                                                                                      |
| <b>kinesin</b>   | 145.2                                                 | 1651.7  | 798.1           | AV705253                | MmugDNA.16319.1.S1_at                                                                                                                                  | gDNA.Hs.154428.0.S1 FEA=U133PSR GEN=ALS2CR3 DEF=Orthologous to 202124_s_at amyotrophic lateral sclerosis 2 (juvenile) chromosome region, candidate 3   |                                                                                                                                      |
|                  | 999.3                                                 | 7049.35 | 4582            | BF223224                | MmugDNA.8525.1.S1_at                                                                                                                                   | gDNA.Hs.149436.0.A1 FEA=U133PSR GEN=KIF5B DEF=Orthologous to 201991_s_at kinesin family member 5B                                                      |                                                                                                                                      |
|                  | 335.3                                                 | 2362.25 | 783.3           | AA284075                | MmugDNA.39631.1.S1_at                                                                                                                                  | gDNA.Hs.117977.1.A1 FEA=U133PSR GEN=KNS2 DEF=Orthologous to 212877_at kinesin 2 60 70kDa                                                               |                                                                                                                                      |
|                  | 78.5                                                  | 496.6   | 234.7           | NM_014965               | MmugDNA.11023.1.S1_at                                                                                                                                  | gDNA.g7862457 FEA=U133PSR GEN=OIP106 DEF=Orthologous to 202080_s_at OGT(O-Glc-Nac transferase)-interacting protein 106 kDa                             |                                                                                                                                      |
|                  | 46.25                                                 | 242.75  | 164.6           | BG473130                | MmugDNA.1261.1.S1_at                                                                                                                                   | gDNA.Hs.259873.0.S1 FEA=U133PSR GEN=KIF1A DEF=Orthologous to 203849_s_at kinesin family member 1A                                                      |                                                                                                                                      |
|                  | 422.6                                                 | 1656.05 | 1695            | ZZ2551                  | MmugDNA.42843.1.S1_s_at                                                                                                                                | gDNA.Hs.211577.1.S1 FEA=U133PSR GEN=KTN1 TXNDX7 DEF=Orthologous to 214709_s_at Kinesin 1 (kinesin receptor) thioredoxin domain containing 7            |                                                                                                                                      |
|                  | 715.4                                                 | 2736.3  | 2117            | BF989024                | MmugDNA.18302.1.S1_at                                                                                                                                  | gDNA.Hs.211577.0.S1 FEA=U133PSR GEN=KTN1 DEF=Orthologous to 200914_x_at kinesin 1 (kinesin receptor)                                                   |                                                                                                                                      |
|                  | 51.2                                                  | 258.15  | 67.15           | BF197057                | MmugDNA.3787.1.S1_at                                                                                                                                   | gDNA.Hs.265317.0.A1 FEA=U133PSR GEN=C14orf153 DEF=Orthologous to 225948_at chromosome 14 open reading frame 153                                        |                                                                                                                                      |
|                  | 210.9                                                 | 930.55  | 310.6           | AI197374                | MmugDNA.10001.1.S1_at                                                                                                                                  | gDNA.Hs.301206.0.A1 FEA=U133PSR GEN=KIF3B DEF=Orthologous to 225205_at kinesin family member 3B                                                        |                                                                                                                                      |
|                  | 33.65                                                 | 125.45  | 69.15           | NM_004521               | MmugDNA.29118.1.S1_at                                                                                                                                  | gDNA.g4758647 FEA=U133PSR GEN=KIF5B DEF=Orthologous to 201992_s_at kinesin family member 5B                                                            |                                                                                                                                      |
|                  | 967.5                                                 | 3314.35 | 1915            | BF939474                | MmugDNA.13708.1.S1_at                                                                                                                                  | gDNA.Hs.129908.0.A2 FEA=U133PSR GEN=KIF1B DEF=Orthologous to 209234_at kinesin family member 1B                                                        |                                                                                                                                      |

|       |         |       |           |                         |                     |             |              |                                                                                                          |
|-------|---------|-------|-----------|-------------------------|---------------------|-------------|--------------|----------------------------------------------------------------------------------------------------------|
| 1090  | 3542.7  | 2303  | BF059313  | MmugDNA.11696.1.S1_at   | gDNA.Hs.6641.0.S1   | FEA=U133PSR | GEN=KIF5C    | DEF=Orthologous to 203129_s_at kinesin family member 5C                                                  |
| 84.7  | 215.15  | 208.8 | NM_024704 | MmugDNA.12624.1.S1_at   | gDNA.g13375994      | FEA=U133PSR | GEN=C20orf23 | DEF=Orthologous to 219570_at chromosome 20 open reading frame 23                                         |
| 784.6 | 2245.9  | 1598  | AA630326  | MmugDNA.33489.1.S1_at   | gDNA.Hs.149436.1.A1 | FEA=U133PSR | GEN=KIF5B    | DEF=Orthologous to 224662_at kinesin family member 5B                                                    |
| 399   | 1145.7  | 711.7 | NM_014970 | MmugDNA.19383.1.S1_at   | gDNA.g7657592       | FEA=U133PSR | GEN=KIFAP3   | DEF=Orthologous to 203333_at kinesin-associated protein 3                                                |
| 179.6 | 496.8   | 286.9 | AI657069  | MmugDNA.19156.1.S1_s_at | gDNA.Hs.105187.3.S1 | FEA=U133PSR | GEN=KIF9     | DEF=Orthologous to 231319_x_at kinesin family member 9                                                   |
| 2598  | 6859.25 | 3490  | NM_004522 | MmugDNA.29119.1.S1_at   | gDNA.g4758649       | FEA=U133PSR | GEN=KIF5C    | DEF=Orthologous to 203130_s_at kinesin family member 5C                                                  |
| 673.4 | 1811.25 | 843.1 | NM_015049 | MmugDNA.24148.1.S1_at   | gDNA.g13027379      | FEA=U133PSR | GEN=ALS2CR3  | DEF=Orthologous to 202125_s_at amyotrophic lateral sclerosis 2 (juvenile) chromosome region, candidate 3 |
| 440.4 | 1182.1  | 505.9 | AL135264  | MmugDNA.39479.1.S1_at   | gDNA.Hs.14434.0.A1  | FEA=U133PSR | GEN=KIF1B    | DEF=Orthologous to 225878_at Kinesin family member 1B                                                    |
| 327.8 | 669.4   | 331.7 | BF056095  | MmugDNA.28049.1.S1_at   | gDNA.Hs.30861.0.A1  | FEA=U133PSR | GEN=TMEM42   | DEF=Orthologous to 226361_at transmembrane protein 42                                                    |
| 674.8 | 313.2   | 767.1 | NM_022822 | MmugDNA.26537.1.S1_at   | gDNA.g12383061      | FEA=U133PSR | GEN=KLC2     | DEF=Orthologous to 218906_x_at likely ortholog of kinesin light chain 2                                  |
| 193.7 | 248.5   | 35.75 | NM_004798 | MmugDNA.29117.1.S1_s_at | gDNA.g4758645       | FEA=U133PSR | GEN=KIF3B    | DEF=Orthologous to 203943_at kinesin family member 3B                                                    |
| 341.2 | 64.2    | 215.6 | BC000712  | MmugDNA.9497.1.S1_at    | gDNA.g12653842      | FEA=U133PSR | GEN=KIFC1    | DEF=Orthologous to 209680_s_at kinesin family member C1                                                  |
