# Supplementary material
Source: PubMed Central journal article supplement (PMC4508249)
Supplement: NIHMS642757-supplement-6.pdf [file NIHMS642757-supplement-6.pdf]

Supplement 5. Probe sets for genes related to Alzheimer's and Parkinson's in serotonin neurons. All probe sets changed 2-fold or greater with E or E+P treatment.

| Search      | Mean Signal Intensity |         |         | Gene ID    | Gene Title                                                                                                                                                                                            |
|-------------|-----------------------|---------|---------|------------|-------------------------------------------------------------------------------------------------------------------------------------------------------------------------------------------------------|
| Ovx         | E                     | E+P     | Gene ID | Gene Title |                                                                                                                                                                                                       |
| Alzheimer's | 54.5                  | 4840.45 | 918.3   | CO649101   | AFFX-Mmu-gapdh-5_at M. mulatta GEN=gapdh DB_XREF=gb:CO649101 DB_XREF=gi:50570595 DB_XREF=ILLUMIGEN_MCQ_42691 FEA=mRNA CLONE=IBIUW:22567 DEF=gapdh                                                     |
|             | 52.2                  | 3976.65 | 893.05  | N33009     | MmugDNA.31898.1.S1_s_agDNA.Hs.169401.0.S1 FEA=U133PSR GEN=APOE DEF=Orthologous to 203381_s_at apolipoprotein E                                                                                        |
|             | 179.35                | 7001.75 | 2658.35 | CB308652   | Mmu.3902.1.S1_at gb:CB308652 DB_XREF=gi:28831362 DB_XREF=AGENCOURT_11771965 CLONE=IMAGE:6882338 TID=Mmu.3902.1 CNT=4 FEA=EST TIER=ConsEnd STK=0                                                       |
|             | 244.25                | 6410.85 | 1160.8  | CO649101   | AFFX-Mmu-gapdh-M_x_at M. mulatta GEN=gapdh DB_XREF=gb:CO649101 DB_XREF=gi:50570595 DB_XREF=ILLUMIGEN_MCQ_42691 FEA=mRNA CLONE=IBIUW:22567 DEF=gapdh                                                   |
|             | 134.65                | 3136.85 | 913     | CX078587   | Mmu.2238.1.S1_at gb:CX078587 DB_XREF=gi:56592577 DB_XREF=ILLUMIGEN_MCQ_2018 CLONE=IBIUW:30225 TID=Mmu.2238.1 CNT=19 FEA=EST TIER=ConsEnd STK=0                                                        |
|             | 18.9                  | 210.6   | 210.85  | NM_004636  | MmugDNA.30636.1.S1_at gDNA.g4758891 FEA=U133PSR GEN=EIF2AK3 DEF=Orthologous to 218696_at eukaryotic translation initiation factor 2-alpha kinase 3                                                    |
|             | 300.9                 | 5308.15 | 1231    | NM_000041  | MmugDNA.17966.1.S1_x_agDNA.g4567324 FEA=U133PSR GEN=APOE DEF=Orthologous to 203382_s_at apolipoprotein E                                                                                              |
|             | 177.45                | 2564.9  | 942.35  | CX078600   | Mmu.2126.1.S1_s_at gb:CX078600 DB_XREF=gi:56592590 DB_XREF=ILLUMIGEN_MCQ_42100 CLONE=IBIUW:30247 TID=Mmu.2126.1 CNT=25 FEA=EST TIER=ConsEnd STK=0                                                     |
|             | 86.35                 | 1024.8  | 512.35  | CO580535   | Mmu.7758.1.S1_at gb:CO580535 DB_XREF=gi:50411701 DB_XREF=ILLUMIGEN_MCQ_48559 CLONE=IBIUW:19027 TID=Mmu.7758.1 CNT=9 FEA=EST TIER=ConsEnd STK=0                                                        |
|             | 125.5                 | 1606.35 | 576.95  | BC000649   | MmugDNA.8653.1.S1_at gDNA.g12653726 FEA=U133PSR GEN=UQCRCF1 DEF=Orthologous to 208909_at ubiquinol-cytochrome c reductase, Rieske iron-sulfur polypeptide 1                                           |
|             | 126.5                 | 1711.95 | 475.25  | CX078600   | Mmu.2126.1.S1_at gb:CX078600 DB_XREF=gi:56592590 DB_XREF=ILLUMIGEN_MCQ_42100 CLONE=IBIUW:30247 TID=Mmu.2126.1 CNT=25 FEA=EST TIER=ConsEnd STK=0                                                       |
|             | 46.65                 | 639.2   | 150.1   | U23850     | MmugDNA.3681.1.S1_s_atgDNA.Hs.198443.2.S1 FEA=U133PSR GEN=ITPR1 DEF=Orthologous to 216944_s_at inositol 1,4,5-triphosphate receptor, type 1                                                           |
|             | 22.9                  | 257.25  | 84.15   | NM_002496  | MmugDNA.42544.1.S1_at gDNA.g4505370 FEA=U133PSR GEN=NDUFS8 DEF=Orthologous to 203189_s_at NADH dehydrogenase (ubiquinone) Fe-S protein 8, 23kDa (NADH-coenzyme Q reductase)                           |
|             | 9.55                  | 96.7    | 42.65   | AB050436   | MmugDNA.38319.1.S1_at gDNA.g13568406 FEA=U133PSR GEN=BACE1 DEF=Orthologous to 224335_s_at beta-site APP-cleaving enzyme 1 beta-site APP-cleaving enzyme 1                                             |
|             | 435.85                | 4015.8  | 1669.65 | NM_001861  | MmugDNA.16704.1.S1_at gDNA.g4502980 FEA=U133PSR GEN=COX4I1 DEF=Orthologous to 202698_x_at cytochrome c oxidase subunit IV isoform 1                                                                   |
|             | 49.95                 | 318.7   | 324.75  | BC000251   | MmugDNA.29314.1.S1_at gDNA.g12652980 FEA=U133PSR GEN=GSK3B DEF=Orthologous to 209945_s_at glycogen synthase kinase 3 beta                                                                             |
|             | 183.55                | 1617.6  | 599.2   | NM_000933  | MmugDNA.2360.1.S1_at gDNA.g4505866 FEA=U133PSR GEN=PLCB4 DEF=Orthologous to 203896_s_at phospholipase C, beta 4                                                                                       |
|             | 14.7                  | 284.5   | 273.2   | NM_004346  | MmugDNA.6342.1.S1_at gDNA.g4757911 FEA=U133PSR GEN=CASP3 DEF=Orthologous to 202763_at caspase 3, apoptosis-related cysteine protease                                                                  |
|             | 352.35                | 2232.9  | 1230.15 | NM_003002  | MmugDNA.27382.1.S1_at gDNA.g4506864 FEA=U133PSR GEN=SDHD DEF=Orthologous to 202026_at succinate dehydrogenase complex, subunit D, integral membrane protein                                           |
|             | 1280.1                | 8540.4  | 3545.3  | AA854966   | MmugDNA.39322.1.S1_s_agDNA.Hs.113205.2.S1 FEA=U133PSR GEN=COX4I1 DEF=Orthologous to 200086_s_at cytochrome c oxidase subunit IV isoform 1 cytochrome c oxidase subunit IV isoform 1                   |
|             | 67.3                  | 378.4   | 253.35  | AA834576   | MmugDNA.32745.1.S1_at gDNA.Hs.238272.0.A2 FEA=U133PSR GEN=ITPR2 DEF=Orthologous to 202660_at inositol 1,4,5-triphosphate receptor, type 2                                                             |
|             | 351.95                | 2097.8  | 1174.4  | CO644739   | Mmu.12382.1.S1_s_at gb:CO644739 DB_XREF=gi:50566233 DB_XREF=ILLUMIGEN_MCQ_43431 CLONE=IBIUW:22477 TID=Mmu.12382.1 CNT=2 FEA=EST TIER=ConsEnd STK=0                                                    |
|             | 251.5                 | 1458    | 802.8   | NM_003000  | MmugDNA.9546.1.S1_s_atgDNA.g9257241 FEA=U133PSR GEN=SDHB DEF=Orthologous to 202675_at succinate dehydrogenase complex, subunit B, iron sulfur (lp)                                                    |
|             | 667.7                 | 3448.25 | 2326.75 | CO581557   | Mmu.5257.1.S1_at gb:CO581557 DB_XREF=gi:50412948 DB_XREF=ILLUMIGEN_MCQ_47054 CLONE=IBIUW:18627 TID=Mmu.5257.1 CNT=3 FEA=EST TIER=ConsEnd STK=1                                                        |
|             | 106.55                | 716.95  | 215.15  | CO580643   | Mmu.1775.1.S1_at gb:CO580643 DB_XREF=gi:50411831 DB_XREF=ILLUMIGEN_MCQ_48393 CLONE=IBIUW:18409 TID=Mmu.1775.1 CNT=3 FEA=mRNA TIER=ConsEnd STK=0                                                       |
|             | 262                   | 1423.2  | 752.85  | NM_004549  | MmugDNA.29870.1.S1_at gDNA.g4758783 FEA=U133PSR GEN=NDUFC2 DEF=Orthologous to 218101_s_at NADH dehydrogenase (ubiquinone) 2, 14.5kDa                                                                  |
|             | 21.35                 | 55      | 117     | AF486845   | MmugDNA.424.1.S1_at gDNA.Hs.367945.4.S1 FEA=U133PSR GEN=CASP12P1 DEF=Orthologous to 1564736_a_at caspase 12 pseudogene 1                                                                              |
|             | 544                   | 2767.45 | 1483.5  | AA129773   | MmugDNA.1694.1.S1_at gDNA.Hs.66151.0.S1 FEA=U133PSR DEF=Orthologous to 224621_at LOC440806                                                                                                            |
|             | 122.55                | 550     | 404.6   | BC005230   | MmugDNA.13044.1.S1_at gDNA.g13528857 FEA=U133PSR GEN=UQCRCB DEF=Orthologous to 209065_at ubiquinol-cytochrome c reductase binding protein                                                             |
|             | 40.75                 | 261.1   | 51.8    | BF671883   | MmugDNA.37191.1.S1_at gDNA.Hs.158849.0.S1 FEA=U133PSR GEN=ATF6 DEF=Orthologous to 231927_at Activating transcription factor 6                                                                         |
|             | 113.95                | 590.1   | 275.8   | CO726069   | Mmu.12831.2.S1_at gb:CO726069 DB_XREF=gi:50707380 DB_XREF=ILLUMIGEN_MCQ_42734 CLONE=IBIUW:28236 TID=Mmu.12831.2 CNT=3 FEA=EST TIER=ConsEnd STK=0                                                      |
|             | 54.05                 | 310.25  | 83.8    | L38019     | MmugDNA.20056.1.S1_at gDNA.g1464750 FEA=U133PSR GEN=ITPR1 DEF=Orthologous to 211323_s_at inositol 1,4,5-triphosphate receptor, type 1                                                                 |
|             | 618.85                | 2692.35 | 1722.4  | BF222895   | MmugDNA.26347.1.S1_at gDNA.Hs.296261.0.S3 FEA=U133PSR GEN=GNAQ DEF=Orthologous to 202615_at guanine nucleotide binding protein (G protein), q polypeptide                                             |
|             | 192.8                 | 1008.15 | 364.2   | T65537     | MmugDNA.26473.1.S1_at gDNA.Hs.6818.0.A1 FEA=U133PSR GEN=GRIN2A DEF=Orthologous to 231384_at Glutamate receptor, ionotropic, N-methyl D-aspartate 2A                                                   |
|             | 1169                  | 5145.8  | 2985.5  | NM_005006  | MmugDNA.17856.1.S1_at gDNA.g4826855 FEA=U133PSR GEN=NDUFS1 DEF=Orthologous to 203039_s_at NADH dehydrogenase (ubiquinone) Fe-S protein 1, 75kDa (NADH-coenzyme Q reductase)                           |
|             | 603.1                 | 2637.9  | 1547.2  | AA911231   | MmugDNA.41399.1.S1_s_agDNA.Hs.272458.0.S2 FEA=U133PSR GEN=PPP3CA DEF=Orthologous to 202457_s_at protein phosphatase 3 (formerly 2B), catalytic subunit, alpha isoform (calcineurin A alpha)           |
|             | 1207.15               | 5201.75 | 3000.4  | NM_001685  | MmugDNA.11379.1.S1_at gDNA.g4502292 FEA=U133PSR GEN=ATP5J DEF=Orthologous to 202325_s_at ATP synthase, H+ transporting, mitochondrial F0 complex, subunit F6                                          |
|             | 107.95                | 414.2   | 314.35  | BF672975   | MmugDNA.10451.1.S1_at gDNA.Hs.180878.0.A1 FEA=U133PSR GEN=LPL DEF=Orthologous to 203548_s_at lipoprotein lipase                                                                                       |
|             | 883.25                | 3354    | 2598.95 | NM_002492  | MmugDNA.42522.1.S1_at gDNA.g4505362 FEA=U133PSR GEN=NDUFB5 DEF=Orthologous to 203621_at NADH dehydrogenase (ubiquinone) 1 beta subcomplex, 5, 16kDa                                                   |
|             | 453.45                | 2121.4  | 932.95  | NM_004551  | MmugDNA.29873.1.S1_at gDNA.g4758787 FEA=U133PSR GEN=NDUFS3 DEF=Orthologous to 201740_at NADH dehydrogenase (ubiquinone) Fe-S protein 3, 30kDa (NADH-coenzyme Q reductase)                             |
|             | 1063.95               | 4505.7  | 2411.85 | NM_005004  | MmugDNA.17855.1.S1_at gDNA.g4826853 FEA=U133PSR GEN=NDUFB6 DEF=Orthologous to 201226_at NADH dehydrogenase (ubiquinone) 1 beta subcomplex, 8, 19kDa                                                   |
|             | 254.1                 | 1105.9  | 508.25  | NM_002493  | MmugDNA.42525.1.S1_at gDNA.g4505364 FEA=U133PSR GEN=NDUFB6 DEF=Orthologous to 203613_s_at NADH dehydrogenase (ubiquinone) 1 beta subcomplex, 6, 17kDa                                                 |
|             | 1041.05               | 4327.75 | 2260.1  | NM_001689  | MmugDNA.11978.1.S1_at gDNA.g4502300 FEA=U133PSR GEN=ATP5G3 DEF=Orthologous to 207508_at ATP synthase, H+ transporting, mitochondrial F0 complex, subunit c (subunit 9) isoform 3                      |
|             | 116.75                | 564.05  | 173.8   | CN649882   | Mmu.9989.1.S1_s_at gb:CN649882 DB_XREF=gi:47160425 DB_XREF=ILLUMIGEN_MCQ_27514 CLONE=IBIUW:8046 TID=Mmu.9989.1 CNT=4 FEA=EST TIER=ConsEnd STK=0                                                       |
|             | 1227                  | 4774.7  | 2778.45 | AV711183   | MmugDNA.356.1.S1_s_at gDNA.Hs.155433.3.A1 FEA=U133PSR GEN=ATP5C1 DEF=Orthologous to 213366_x_at ATP synthase, H+ transporting, mitochondrial F1 complex, gamma polypeptide 1                          |
|             | 215.55                | 985.05  | 325     | NM_002222  | MmugDNA.18191.1.S1_at gDNA.g10835022 FEA=U133PSR GEN=ITPR1 DEF=Orthologous to 203710_at inositol 1,4,5-triphosphate receptor, type 1                                                                  |
|             | 528.5                 | 2220.65 | 920.6   | BG260394   | MmugDNA.29351.1.S1_at gDNA.Hs.76930.1.A1 FEA=U133PSR GEN=SNCA DEF=Orthologous to 204466_s_at synuclein, alpha (non A4 component of amyloid precursor)                                                 |
|             | 261.85                | 957.2   | 588.2   | BE741920   | MmugDNA.24918.1.S1_at gDNA.Hs.1665.1.A1 FEA=U133PSR GEN=NDUFA11 DEF=Orthologous to 225304_s_at NADH dehydrogenase (ubiquinone) 1 alpha subcomplex, 11, 14.7kDa                                        |
|             | 1468.85               | 4487.2  | 3958.6  | NM_002494  | MmugDNA.42530.1.S1_at gDNA.g4505366 FEA=U133PSR GEN=NDUFC1 DEF=Orthologous to 203478_at NADH dehydrogenase (ubiquinone) 1, subcomplex unknown, 1, 6kDa                                                |
|             | 802.2                 | 2924.2  | 1641.05 | NM_001916  | MmugDNA.35607.1.S1_at gDNA.g4503184 FEA=U133PSR GEN=CYC1 DEF=Orthologous to 201066_at cytochrome c-1                                                                                                  |
|             | 3884.65               | 6266.9  | 3884.65 | AF217092   | MmugDNA.7413.1.S1_at gDNA.g9651636 FEA=U133PSR GEN=DAP13 DEF=Orthologous to 223244_s_at 13kDa differentiation-associated protein                                                                      |
|             | 1118.25               | 4664.65 | 1628.35 | NM_001697  | MmugDNA.11979.1.S1_at gDNA.g4502302 FEA=U133PSR GEN=ATP5O DEF=Orthologous to 200818_at ATP synthase, H+ transporting, mitochondrial F1 complex, O subunit (oligomycin sensitivity conferring protein) |
|             | 695.3                 | 2489.9  | 1415.7  | BC003674   | MmugDNA.23282.1.S1_s_agDNA.g13277539 FEA=U133PSR GEN=NDUFA2 DEF=Orthologous to 209224_s_at NADH dehydrogenase (ubiquinone) 1 alpha subcomplex, 2, 8kDa                                                |
|             | 125.7                 | 440.25  | 261.75  | L36674     | MmugDNA.8226.1.S1_s_atgDNA.g556211 FEA=U133PSR GEN=SNCA DEF=Orthologous to 211546_x_at synuclein, alpha (non A4 component of amyloid precursor)                                                       |
|             | 189.6                 | 685.4   | 366.45  | CO648220   | Mmu.9951.1.S1_at gb:CO648220 DB_XREF=gi:50569714 DB_XREF=ILLUMIGEN_MCQ_41525 CLONE=IBIUW:25875 TID=Mmu.9951.1 CNT=2 FEA=EST TIER=ConsEnd STK=0                                                        |
|             | 153.1                 | 594.35  | 235.3   | U23850     | MmugDNA.3681.1.S1_at gDNA.Hs.198443.2.S1 FEA=U133PSR GEN=ITPR1 DEF=Orthologous to 216944_s_at inositol 1,4,5-triphosphate receptor, type 1                                                            |
|             | 694.55                | 2074.75 | 1598.45 | M23254     | MmugDNA.34671.1.S1_at gDNA.g511636 FEA=U133PSR GEN=CAPN2 DEF=Orthologous to 208683_at calpain 2, (m II) large subunit                                                                                 |
|             | 2989.55               | 10262.5 | 5317.05 | AA653730   | MmugDNA.27126.1.S1_at gDNA.Hs.279009.6.A1 FEA=U133PSR GEN=CALM1 DEF=Orthologous to 211985_s_at calmodulin 1 (phosphorylase kinase, delta)                                                             |

|         |         |         |           |                         |                      |                     |                             |                                |                                                                                                  |          |                   |              |       |
|---------|---------|---------|-----------|-------------------------|----------------------|---------------------|-----------------------------|--------------------------------|--------------------------------------------------------------------------------------------------|----------|-------------------|--------------|-------|
| 1949.15 | 6135.6  | 3990    | NM_004547 | MmugDNA.18635.1.S1_at   | gDNA.g6041666        | FEA=U133PSR         | GEN=NDUF84                  | DEF=Orthologous to 218226_s_at | NADH dehydrogenase (ubiquinone) 1 beta subcomplex, 4, 15kDa                                      |          |                   |              |       |
| 734.1   | 2760.4  | 974.15  | NM_021132 | MmugDNA.25461.1.S1_at   | gDNA.g11036639       | FEA=U133PSR         | GEN=PPP3CB                  | DEF=Orthologous to 202432_at   | protein phosphatase 3 (formerly 2B), catalytic subunit, beta isoform (calcineurin A beta)        |          |                   |              |       |
| 1308.25 | 3615.45 | 1616.15 | BC005960  | MmugDNA.33303.1.S1_at   | gDNA.g13543617       | FEA=U133PSR         | GEN=ATP5F1                  | DEF=Orthologous to 211755_s_at | ATP synthase, H+ transporting, mitochondrial F0 complex, subunit b, isoform 1                    |          |                   |              |       |
| 401.25  | 1450.15 | 533.65  | AL353950  | MmugDNA.13010.1.S1_at   | gDNA.g7696991        | FEA=U133PSR         | GEN=PPP3CA                  | DEF=Orthologous to 202429_s_at | protein phosphatase 3 (formerly 2B), catalytic subunit, alpha isoform (calcineurin A alpha)      |          |                   |              |       |
| 4597.25 | 9676.25 | 13037   | BC000454  | MmugDNA.5599.1.S1_s_at  | gDNA.g12653368       | FEA=U133PSR         | GEN=CALM1                   | DEF=Orthologous to 209563_x_at | calmodulin 1 (phosphorylase kinase, delta)                                                       |          |                   |              |       |
| 802.35  | 2589.15 | 1349.05 | AL080089  | MmugDNA.38309.1.S1_s_at | gDNA.g5262506        | FEA=U133PSR         | GEN=ATP5G1                  | DEF=Orthologous to 208972_s_at | ATP synthase, H+ transporting, mitochondrial F0 complex, subunit c (subunit 9), isoform 1        |          |                   |              |       |
| 1413.05 | 4999.65 | 1906.7  | M27319    | MmugDNA.1229.1.S1_s_at  | gDNA.g179809         | FEA=U133PSR         | GEN=CALM1                   | DEF=Orthologous to 200653_s_at | calmodulin 1 (phosphorylase kinase, delta)                                                       |          |                   |              |       |
| 349.2   | 985.9   | 715.75  | NM_005000 | MmugDNA.13561.1.S1_at   | gDNA.g13699821       | FEA=U133PSR         | GEN=NDUFA5                  | DEF=Orthologous to 201304_at   | NADH dehydrogenase (ubiquinone) 1 alpha subcomplex, 5, 13kDa                                     |          |                   |              |       |
| 346.2   | 970.2   | 691.75  | AL567411  | MmugDNA.19826.1.S1_s_at | gDNA.Hs.93597.0.S2   | FEA=U133PSR         | GEN=CDK5R1                  | DEF=Orthologous to 204995_at   | cyclin-dependent kinase 5, regulatory subunit 1 (p35)                                            |          |                   |              |       |
| 538.3   | 1908.5  | 655.5   | NM_003365 | MmugDNA.8160.1.S1_at    | gDNA.g4507840        | FEA=U133PSR         | GEN=UQCRC1                  | DEF=Orthologous to 201903_at   | ubiquinol-cytochrome c reductase core protein I                                                  |          |                   |              |       |
| 1069.45 | 3140.6  | 1864.85 | NM_004542 | MmugDNA.29850.1.S1_at   | gDNA.g4758771        | FEA=U133PSR         | GEN=NDUFA3                  | DEF=Orthologous to 218563_at   | NADH dehydrogenase (ubiquinone) 1 alpha subcomplex, 3, 9kDa                                      |          |                   |              |       |
| 221.7   | 782.05  | 248.45  | BQ807466  | Mmu.3908.1.S1_s_at      | gb:BQ807466          | DB_XREF=gi:22031675 | DB_XREF=NISC_KK04c11.y2     | CLONE=IMAGE:5330325            | TID=Mmu.3908.1                                                                                   | CNT=12   | FEA=EST           | TIER=ConsEnd | STK=0 |
| 1621    | 4740.55 | 2763.35 | BC005299  | MmugDNA.31771.1.S1_s_at | gDNA.g13529022       | FEA=U133PSR         | GEN=CYCS                    | DEF=Orthologous to 208905_at   | cytochrome c, somatic                                                                            |          |                   |              |       |
| 445.25  | 1224.3  | 834.55  | NM_021075 | MmugDNA.30188.1.S1_at   | gDNA.Hs.59745.0.S1   | FEA=U133PSR         | GEN=NDUUF3                  | DEF=Orthologous to 226616_s_at | NADH dehydrogenase (ubiquinone) flavoprotein 3, 10kDa                                            |          |                   |              |       |
| 1380.9  | 3974.3  | 2381    | NM_004552 | MmugDNA.29879.1.S1_at   | gDNA.g4758789        | FEA=U133PSR         | GEN=NDUFS5                  | DEF=Orthologous to 201757_at   | NADH dehydrogenase (ubiquinone) Fe-S protein 5, 15kDa (NADH-coenzyme Q reductase)                |          |                   |              |       |
| 4121.7  | 10974.8 | 7867.1  | AI587323  | MmugDNA.23434.1.S1_at   | gDNA.Hs.155101.3.A1  | FEA=U133PSR         | GEN=ATP5A1                  | DEF=Orthologous to 213738_s_at | ATP synthase, H+ transporting, mitochondrial F1 complex, alpha subunit 1, cardiac muscle         |          |                   |              |       |
| 540.3   | 1558.75 | 902.35  | NM_005001 | MmugDNA.17832.1.S1_at   | gDNA.g4826849        | FEA=U133PSR         | GEN=NDUFA7                  | DEF=Orthologous to 202785_at   | NADH dehydrogenase (ubiquinone) 1 alpha subcomplex, 7, 14.5kDa                                   |          |                   |              |       |
| 1014.95 | 2882.5  | 1691.65 | NM_006830 | MmugDNA.14855.1.S1_at   | gDNA.g5803216        | FEA=U133PSR         | GEN=UQCR                    | DEF=Orthologous to 202090_s_at | ubiquinol cytochrome c reductase, 6.4kDa subunit                                                 |          |                   |              |       |
| 261.8   | 536.95  | 619.1   | BF969428  | MmugDNA.30957.1.S1_at   | gDNA.Hs.5437.3.A2    | FEA=U133PSR         | GEN=GNAQC                   | DEF=Orthologous to 224862_at   | Guanine nucleotide binding protein (G protein), q polypeptide                                    |          |                   |              |       |
| 1822.15 | 4590.5  | 3391.4  | NM_004374 | MmugDNA.24731.1.S1_at   | gDNA.g4758039        | FEA=U133PSR         | GEN=COX6C                   | DEF=Orthologous to 201754_at   | cytochrome c oxidase subunit VIc                                                                 |          |                   |              |       |
| 133.65  | 367.8   | 213.7   | AA576497  | MmugDNA.24210.1.S1_at   | gDNA.Hs.252497.0.A1  | FEA=U133PSR         | GEN=ATF6                    | DEF=Orthologous to 217550_at   | Activating transcription factor 6                                                                |          |                   |              |       |
| 142.05  | 278.25  | 333.75  | NM_016835 | MmugDNA.27209.1.S1_at   | gDNA.g4000712        | FEA=U133PSR         | GEN=MAPT                    | DEF=Orthologous to 203930_s_at | microtubule-associated protein tau                                                               |          |                   |              |       |
| 311.1   | 868.05  | 434.95  | AF092131  | MmugDNA.23407.1.S1_at   | gDNA.g5138911        | FEA=U133PSR         | GEN=NDUUF1                  | DEF=Orthologous to 208714_at   | NADH dehydrogenase (ubiquinone) flavoprotein 1, 51kDa                                            |          |                   |              |       |
| 1486.45 | 4239.9  | 1881.9  | AF261090  | MmugDNA.726.1.S1_at     | gDNA.g9802311        | FEA=U133PSR         | GEN=NDUFB9                  | DEF=Orthologous to 222992_s_at | NADH dehydrogenase (ubiquinone) 1 beta subcomplex, 9, 22kDa                                      |          |                   |              |       |
| 240.95  | 526.8   | 462.35  | AU135154  | MmugDNA.7261.1.S1_at    | gDNA.Hs.172028.1.A1  | FEA=U133PSR         | GEN=ADAM10                  | DEF=Orthologous to 214895_s_at | disintegrin and metalloproteinase domain 10                                                      |          |                   |              |       |
| 145.4   | 442.2   | 154.05  | NM_003001 | MmugDNA.9551.1.S1_at    | gDNA.g9257243        | FEA=U133PSR         | GEN=SDHC                    | DEF=Orthologous to 202004_x_at | succinate dehydrogenase complex, subunit C, integral membrane protein, 15kDa                     |          |                   |              |       |
| 142.75  | 385.2   | 198.35  | NM_004935 | MmugDNA.16390.1.S1_at   | gDNA.g4826674        | FEA=U133PSR         | GEN=CDK5                    | DEF=Orthologous to 204247_s_at | cyclin-dependent kinase 5                                                                        |          |                   |              |       |
| 474.75  | 1115.3  | 799.85  | NM_002490 | MmugDNA.42599.1.S1_at   | gDNA.g4505358        | FEA=U133PSR         | GEN=NDUFA6                  | DEF=Orthologous to 202001_s_at | NADH dehydrogenase (ubiquinone) 1 alpha subcomplex, 6, 14kDa                                     |          |                   |              |       |
| 156.5   | 460.35  | 167.95  | NM_000345 | MmugDNA.8691.1.S1_at    | gDNA.g6806896        | FEA=U133PSR         | GEN=SNCA                    | DEF=Orthologous to 204467_s_at | synuclein, alpha (non A4 component of amyloid precursor)                                         |          |                   |              |       |
| 410.75  | 1123.95 | 519.35  | NM_012104 | MmugDNA.13727.1.S1_at   | gDNA.g6912265        | FEA=U133PSR         | GEN=BACE1                   | DEF=Orthologous to 217904_s_at | beta-site APP-cleaving enzyme 1                                                                  |          |                   |              |       |
| 690.4   | 1906.75 | 854.85  | AA199717  | MmugDNA.6394.1.S1_at    | gDNA.Hs.101174.4.A1  | FEA=U133PSR         | GEN=MAPT                    | DEF=Orthologous to 225379_at   | microtubule-associated protein tau                                                               |          |                   |              |       |
| 594.95  | 1468.75 | 909.55  | NM_004493 | MmugDNA.28322.1.S1_at   | gDNA.g4758503        | FEA=U133PSR         | GEN=HADH2                   | DEF=Orthologous to 202282_at   | hydroxyacyl-Coenzyme A dehydrogenase, type II                                                    |          |                   |              |       |
| 1912.35 | 5351.5  | 2283.55 | BC005299  | MmugDNA.31771.1.S1_at   | gDNA.g13529022       | FEA=U133PSR         | GEN=CYCS                    | DEF=Orthologous to 208905_at   | cytochrome c, somatic                                                                            |          |                   |              |       |
| 290.65  | 780.6   | 357.9   | CN646788  | Mmu.8048.1.S1_at        | gb:CN646788          | DB_XREF=gi:47160231 | DB_XREF=ILLUMIGEN_MCQ_27104 | CLONE=IBLUW:8245               | TID=Mmu.8048.1                                                                                   | CNT=3    | FEA=EST           | TIER=ConsEnd | STK=0 |
| 2596.15 | 5667.65 | 4387.65 | NM_006886 | MmugDNA.5716.1.S1_at    | gDNA.g5901895        | FEA=U133PSR         | GEN=ATP5E                   | DEF=Orthologous to 217801_at   | ATP synthase, H+ transporting, mitochondrial F1 complex, epsilon subunit                         |          |                   |              |       |
| 133.3   | 236     | 279.9   | CN641932  | Mmu.16123.2.S1_at       | gb:CN641932          | DB_XREF=gi:47152942 | DB_XREF=ILLUMIGEN_MCQ_5624  | CLONE=IBLUW:5394               | TID=Mmu.16123.2                                                                                  | CNT=2    | FEA=EST           | TIER=ConsEnd | STK=0 |
| 1277.75 | 3027.05 | 1739.8  | BC005270  | MmugDNA.13810.1.S1_at   | gDNA.g13528959       | FEA=U133PSR         | GEN=NDUFS4                  | DEF=Orthologous to 209303_at   | NADH dehydrogenase (ubiquinone) Fe-S protein 4, 18kDa (NADH-coenzyme Q reductase)                |          |                   |              |       |
| 1009.95 | 2558.8  | 1198.95 | NM_004550 | MmugDNA.29871.1.S1_s_at | gDNA.g4758785        | FEA=U133PSR         | GEN=NDUFS2                  | DEF=Orthologous to 201966_at   | NADH dehydrogenase (ubiquinone) Fe-S protein 2, 49kDa (NADH-coenzyme Q reductase)                |          |                   |              |       |
| 2895.45 | 6709.7  | 3833.35 | BC006229  | MmugDNA.8169.1.S1_s_at  | gDNA.g13623258       | FEA=U133PSR         | GEN=COX5B                   | DEF=Orthologous to 211025_x_at | cytochrome c oxidase subunit Vb                                                                  |          |                   |              |       |
| 318.45  | 716.25  | 438.2   | NM_002332 | MmugDNA.29191.1.S1_at   | gDNA.g4758685        | FEA=U133PSR         | GEN=LRP1                    | DEF=Orthologous to 200785_s_at | low density lipoprotein-related protein 1 (alpha-2-macroglobulin receptor)                       |          |                   |              |       |
| 764.1   | 1759.65 | 958.85  | NM_001864 | MmugDNA.16709.1.S1_s_at | gDNA.g4502986        | FEA=U133PSR         | GEN=COX7A1                  | DEF=Orthologous to 204570_at   | cytochrome c oxidase subunit VIIa polypeptide 1 (muscle)                                         |          |                   |              |       |
| 2127.65 | 4441.15 | 2915.7  | NM_006004 | MmugDNA.38710.1.S1_at   | gDNA.g5174744        | FEA=U133PSR         | GEN=UQCRC1                  | DEF=Orthologous to 202233_s_at | ubiquinol-cytochrome c reductase hinge protein                                                   |          |                   |              |       |
| 1269.85 | 2735.4  | 1646.3  | M23114    | MmugDNA.32704.1.S1_at   | gDNA.g184100         | FEA=U133PSR         | GEN=ATP2A2                  | DEF=Orthologous to 209186_at   | ATPase, Ca++ transporting, cardiac muscle, slow twitch 2                                         |          |                   |              |       |
| 781.3   | 1685.2  | 863.6   | AI056359  | MmugDNA.20201.1.S1_at   | gDNA.Hs.101174.1.A3  | FEA=U133PSR         | GEN=MAPT                    | DEF=Orthologous to 203929_s_at | microtubule-associated protein tau                                                               |          |                   |              |       |
| 846.8   | 2573.45 | 611     | NM_015965 | MmugDNA.37472.1.S1_at   | gDNA.g7705733        | FEA=U133PSR         | GEN=GRIM19                  | DEF=Orthologous to 220864_s_at | cell death-regulatory protein GRIM19                                                             |          |                   |              |       |
| 367.9   | 863.9   | 366.5   | NM_019056 | MmugDNA.38548.1.S1_s_at | gDNA.g9506682        | FEA=U133PSR         | GEN=NDUFB11                 | DEF=Orthologous to 218320_s_at | NADH dehydrogenase (ubiquinone) 1 beta subcomplex, 11, 17.3kDa                                   |          |                   |              |       |
| 460.05  | 929.35  | 442.45  | NM_004146 | MmugDNA.6319.1.S1_s_at  | gDNA.g10764846       | FEA=U133PSR         | GEN=NDUFB7                  | DEF=Orthologous to 202839_s_at | NADH dehydrogenase (ubiquinone) 1 beta subcomplex, 7, 18kDa                                      |          |                   |              |       |
| 4825.45 | 9822.2  | 4378.65 | CD768031  | Mmu.7399.1.S1_at        | gb:CD768031          | DB_XREF=gi:32428533 | DB_XREF=AGENCOURT_14718956  | CLONE=IMAGE:6973306            | TID=Mmu.7399.1                                                                                   | CNT=1    | FEA=EST           | TIER=ConsEnd | STK=1 |
| 536.45  | 256.8   | 577.1   | AA993683  | MmugDNA.5110.1.S1_at    | gDNA.Hs.163867.1.A1  | FEA=U133PSR         | GEN=PRO1580                 | DEF=Orthologous to 213550_s_at | hypothetical protein PRO1580                                                                     |          |                   |              |       |
| 268.6   | 120.4   | 270.55  | BC000462  | MmugDNA.5643.1.S1_at    | gDNA.g12653384       | FEA=U133PSR         | GEN=UQCRC                   | DEF=Orthologous to 223613_at   | ubiquinol cytochrome c reductase, 6.4kDa subunit                                                 |          |                   |              |       |
| 179.85  | 169.25  | 83.3    | NM_003366 | MmugDNA.8162.1.S1_at    | gDNA.g4507842        | FEA=U133PSR         | GEN=UQCRC2                  | DEF=Orthologous to 200883_at   | ubiquinol-cytochrome c reductase core protein II                                                 |          |                   |              |       |
| 227.95  | 171.4   | 108.6   | NM_001196 | MmugDNA.18041.1.S1_at   | gDNA.g4557360        | FEA=U133PSR         | GEN=BD1                     | DEF=Orthologous to 204493_at   | BH3 interacting domain death agonist                                                             |          |                   |              |       |
| 334.75  | 124.4   | 273.75  | AL544951  | MmugDNA.8199.1.S1_at    | gDNA.Hs.278540.0.A2  | FEA=U133PSR         | GEN=PPP3R1                  | DEF=Orthologous to 204506_at   | protein phosphatase 3 (formerly 2B), regulatory subunit B, 19kDa, alpha isoform (calcineurin B1) |          |                   |              |       |
| 435.9   | 143.3   | 421.55  | AF453834  | MmugDNA.40691.1.S1_at   | gDNA.Hs2.198271.3.S1 | FEA=U133PSR         | GEN=NDUFA10                 | DEF=Orthologous to 1555548_at  | NADH dehydrogenase (ubiquinone) 1 alpha subcomplex, 10, 42kDa                                    |          |                   |              |       |
| 294.8   | 97.15   | 274.75  | AW190316  | MmugDNA.3420.1.S1_at    | gDNA.Hs.2186.4.A1    | FEA=U133PSR         | GEN=SHMT2                   | DEF=Orthologous to 214095_at   | serine hydroxymethyltransferase 2 (mitochondrial)                                                |          |                   |              |       |
| 213.2   | 92.1    | 110.6   | AI760495  | MmugDNA.15069.1.S1_at   | gDNA.Hs.205711.0.A1  | FEA=U133PSR         | GEN=CYCS                    | DEF=Orthologous to 244546_at   | cytochrome c, somatic                                                                            |          |                   |              |       |
| 287.8   | 112.75  | 165.25  | AA918442  | MmugDNA.15670.1.S1_s_at | gDNA.Hs.326841.0.A1  | FEA=U133PSR         | GEN=IDE                     | DEF=Orthologous to 217496_s_at | insulin-degrading enzyme                                                                         |          |                   |              |       |
| 363.5   | 118.1   | 284.75  | AB062482  | MmugDNA.34532.1.S1_at   | gDNA.Hs2.374685.1.S1 | FEA=U133PSR         | GEN=NDUFS4                  | DEF=Orthologous to 1555057_at  | NADH dehydrogenase (ubiquinone) Fe-S protein 4, 18kDa (NADH-coenzyme Q reductase)                |          |                   |              |       |
| 91991.2 | 28858.2 | 54908.4 | CO649101  | AFX-Mmu-gapdh-3_at      | M. mulatta           | GEN=gapdh           | DB_XREF=gb:CO649101         | DB_XREF=gi:50570595            | DB_XREF=ILLUMIGEN_MCQ_42691                                                                      | FEA=mRNA | CLONE=IBLUW:22567 | DEF=gapdh    |       |
| 15596.2 | 4570.5  | 8352.1  | BC004369  | MmugDNA.36988.1.S1_s_at | gDNA.g13325111       | FEA=U133PSR         | GEN=APP                     | DEF=Orthologous to 211277_x_at | amyloid beta (A4) precursor protein (protease nexin-II, Alzheimer disease)                       |          |                   |              |       |
| 402.65  | 99.1    | 314.3   | NM_001867 | MmugDNA.16732.1.S1_at   | gDNA.g4502992        | FEA=U133PSR         | GEN=COX7C                   | DEF=Orthologous to 201134_x_at | cytochrome c oxidase subunit VIic                                                                |          |                   |              |       |
| 332     | 79.8    | 222.7   | AF149794  | MmugDNA.37633.1.S1_at   | gDNA.g4929486        | FEA=U133PSR         | GEN=APAF1                   | DEF=Orthologous to 211554_s_at | apoptotic protease activating factor                                                             |          |                   |              |       |
| 166.65  | 59.4    | 55.3    | AY004175  | MmugDNA.4164.1.S1_at    | gDNA.g9438228        | FEA=U133PSR         | GEN=PLCB1                   | DEF=Orthologous to 211925_s_at | phospholipase C, beta 1 (phosphoinositide-specific)                                              |          |                   |              |       |

|                    |         |         |           |                                           |                     |                     |                                                                                                                          |                                                                                                                                     |                                   |                  |                      |       |
|--------------------|---------|---------|-----------|-------------------------------------------|---------------------|---------------------|--------------------------------------------------------------------------------------------------------------------------|-------------------------------------------------------------------------------------------------------------------------------------|-----------------------------------|------------------|----------------------|-------|
| 248.65             | 69.25   | 104.15  | NM_001036 | MmugDNA.26610.1.S1_at                     | gDNA.g4506756       | FEA=U133PSR         | GEN=RYR3                                                                                                                 | DEF=Orthologous to 206306_at ryanodine receptor 3                                                                                   |                                   |                  |                      |       |
| 539.35             | 140.7   | 242.2   | AA382702  | MmugDNA.43583.1.S1_x_agDNA.Hs.3462.1.S1   | FEA=U133PSR         | GEN=COX7C           | DEF=Orthologous to 213846_at cytochrome c oxidase subunit VIc                                                            |                                                                                                                                     |                                   |                  |                      |       |
| 757.90             | 22910.4 | 26582   | CC0649101 | AFFX-Mmu-gapdh-3_x_at                     | M. mulatta          | GEN=gapdh           | DB_XREF=gi:50570595                                                                                                      | DB_XREF=ILLUMIGEN_MCO_42691                                                                                                         | FEA=mRNA                          | CLONE=IBIUW22567 | DEF=gapdh            |       |
| 307.95             | 50.05   | 59.65   | AK002110  | MmugDNA.24532.1.S1_at                     | gDNA.Hs.90443.1.A1  | FEA=U133PSR         | GEN=NDUFS8                                                                                                               | DEF=Orthologous to 232169_x_at NADH dehydrogenase (ubiquinone) Fe-S protein 8, 23kDa (NADH-coenzyme Q reductase)                    |                                   |                  |                      |       |
| <b>Parkinson's</b> |         |         |           |                                           |                     |                     |                                                                                                                          |                                                                                                                                     |                                   |                  |                      |       |
| 10.15              | 954.35  | 346.05  | CO581006  | Mmu.13573.1.S1_at                         | gb:CO581006         | DB_XREF=gi:50412266 | DB_XREF=ILLUMIGEN_MCO_47894                                                                                              | CLONE=IBIUW.20870                                                                                                                   | TID=Mmu.13573.1                   | CNT=3            | FEA=EST TIER=ConsEnd | STK=0 |
| 179.35             | 7001.75 | 2658.35 | CB308652  | Mmu.3902.1.S1_at                          | gb:CB308652         | DB_XREF=gi:28831362 | DB_XREF=AGENCOURT_11771965                                                                                               | CLONE=IMAGE:6882338                                                                                                                 | TID=Mmu.3902.1                    | CNT=4            | FEA=EST TIER=ConsEnd | STK=0 |
| 134.65             | 3136.85 | 913     | COX078587 | Mmu.2238.1.S1_at                          | gb:COX078587        | DB_XREF=gi:56592577 | DB_XREF=ILLUMIGEN_MCO_2018                                                                                               | CLONE=IBIUW.30225                                                                                                                   | TID=Mmu.2238.1                    | CNT=19           | FEA=EST TIER=ConsEnd | STK=0 |
| 71.4               | 1264.65 | 325.3   | CN648486  | Mmu.6016.1.S1_at                          | gb:CN648486         | DB_XREF=gi:47161929 | DB_XREF=ILLUMIGEN_MCO_30631                                                                                              | CLONE=IBIUW.6560                                                                                                                    | TID=Mmu.6016.1                    | CNT=2            | FEA=EST TIER=ConsEnd | STK=0 |
| 177.45             | 2564.9  | 942.35  | COX078600 | Mmu.2126.1.S1_s_at                        | gb:COX078600        | DB_XREF=gi:56592590 | DB_XREF=ILLUMIGEN_MCO_42100                                                                                              | CLONE=IBIUW.30247                                                                                                                   | TID=Mmu.2126.1                    | CNT=25           | FEA=EST TIER=ConsEnd | STK=0 |
| 86.35              | 1024.8  | 512.35  | CO580535  | Mmu.7758.1.S1_at                          | gb:CO580535         | DB_XREF=gi:50411701 | DB_XREF=ILLUMIGEN_MCO_48559                                                                                              | CLONE=IBIUW.19027                                                                                                                   | TID=Mmu.7758.1                    | CNT=9            | FEA=EST TIER=ConsEnd | STK=0 |
| 125.5              | 1606.35 | 576.95  | BC000649  | MmugDNA.8653.1.S1_at                      | gDNA.g12653726      | FEA=U133PSR         | GEN=UQCRCF1                                                                                                              | DEF=Orthologous to 208909_at ubiquinol-cytochrome c reductase, Rieske iron-sulfur polypeptide 1                                     |                                   |                  |                      |       |
| 126.5              | 1711.95 | 475.25  | COX078600 | Mmu.2126.1.S1_at                          | gb:COX078600        | DB_XREF=gi:56592590 | DB_XREF=ILLUMIGEN_MCO_42100                                                                                              | CLONE=IBIUW.30247                                                                                                                   | TID=Mmu.2126.1                    | CNT=25           | FEA=EST TIER=ConsEnd | STK=0 |
| 22.9               | 257.25  | 84.15   | NM_002496 | MmugDNA.42544.1.S1_at                     | gDNA.g4505370       | FEA=U133PSR         | GEN=NDUFS8                                                                                                               | DEF=Orthologous to 203189_s_at NADH dehydrogenase (ubiquinone) Fe-S protein 8, 23kDa (NADH-coenzyme Q reductase)                    |                                   |                  |                      |       |
| 435.85             | 4015.8  | 1669.65 | NM_001981 | MmugDNA.16704.1.S1_at                     | gDNA.g4502980       | FEA=U133PSR         | GEN=COX411                                                                                                               | DEF=Orthologous to 202698_x_at cytochrome c oxidase subunit IV isoform 1                                                            |                                   |                  |                      |       |
| 206.45             | 1948    | 740.95  | NM_004181 | MmugDNA.7056.1.S1_at                      | gDNA.g4759283       | FEA=U133PSR         | GEN=UCHL1                                                                                                                | DEF=Orthologous to 201387_s_at ubiquitin carboxyl-terminal esterase L1 (ubiquitin thiolesterase)                                    |                                   |                  |                      |       |
| 48.4               | 383.6   | 173.9   | AF184911  | MmugDNA.35310.1.S1_s_agDNA.g10121319      | FEA=U133PSR         | GEN=PRSS25          | DEF=Orthologous to 211152_s_at protease, serine, 25                                                                      |                                                                                                                                     |                                   |                  |                      |       |
| 54.7               | 284.5   | 273.2   | NM_004346 | MmugDNA.6342.1.S1_at                      | gDNA.g4757911       | FEA=U133PSR         | GEN=CASP3                                                                                                                | DEF=Orthologous to 202763_at caspase 3, apoptosis-related cysteine protease                                                         |                                   |                  |                      |       |
| 157.8              | 1130.65 | 440.4   | CN645512  | Mmu.4271.1.S1_at                          | gb:CN645512         | DB_XREF=gi:47158955 | DB_XREF=ILLUMIGEN_MCO_24113                                                                                              | CLONE=IBIUW.10328                                                                                                                   | TID=Mmu.4271.1                    | CNT=4            | FEA=EST TIER=ConsEnd | STK=0 |
| 352.35             | 2232.9  | 1230.15 | NM_003002 | MmugDNA.27382.1.S1_at                     | gDNA.g4506864       | FEA=U133PSR         | GEN=SDHD                                                                                                                 | DEF=Orthologous to 202026_at succinate dehydrogenase complex, subunit D, integral membrane protein                                  |                                   |                  |                      |       |
| 100.9              | 611.65  | 369.75  | NM_000360 | MmugDNA.5125.1.S1_at                      | gDNA.g4507480       | FEA=U133PSR         | GEN=TH                                                                                                                   | DEF=Orthologous to 208291_s_at tyrosine hydroxylase                                                                                 |                                   |                  |                      |       |
| 1280.1             | 8540.4  | 3545.3  | AA854966  | MmugDNA.39322.1.S1_s_agDNA.Hs.113205.2.S1 | FEA=U133PSR         | GEN=COX411          | DEF=Orthologous to 200086_s_at cytochrome c oxidase subunit IV isoform 1                                                 | cytochrome c oxidase subunit IV isoform 1                                                                                           |                                   |                  |                      |       |
| 351.95             | 2097.8  | 1174.4  | CO644739  | Mmu.12382.1.S1_s_at                       | gb:CO644739         | DB_XREF=gi:50566233 | DB_XREF=ILLUMIGEN_MCO_43431                                                                                              | CLONE=IBIUW.22477                                                                                                                   | TID=Mmu.12382.1                   | CNT=2            | FEA=EST TIER=ConsEnd | STK=0 |
| 569.6              | 4181.6  | 1073.85 | NM_001044 | MmugDNA.2050.1.S1_at                      | gDNA.g4507040       | FEA=U133PSR         | GEN=SLC6A3                                                                                                               | DEF=Orthologous to 206836_at solute carrier family 6 (neurotransmitter transporter, dopamine), member 3                             |                                   |                  |                      |       |
| 251.5              | 1458    | 802.8   | NM_003000 | MmugDNA.9546.1.S1_s_agDNA.g9257241        | FEA=U133PSR         | GEN=SDHB            | DEF=Orthologous to 202675_at succinate dehydrogenase complex, subunit B, iron sulfur (lp)                                |                                                                                                                                     |                                   |                  |                      |       |
| 191.85             | 1338.3  | 364.65  | U90943    | MmugDNA.21230.1.S1_at                     | gDNA.g2735306       | FEA=U133PSR         | GEN=VDAC3                                                                                                                | DEF=Orthologous to 208846_s_at voltage-dependent anion channel 3                                                                    |                                   |                  |                      |       |
| 667.7              | 3448.25 | 2326.75 | CO581557  | Mmu.5257.1.S1_at                          | gb:CO581557         | DB_XREF=gi:50412949 | DB_XREF=ILLUMIGEN_MCO_47054                                                                                              | CLONE=IBIUW.18627                                                                                                                   | TID=Mmu.5257.1                    | CNT=3            | FEA=EST TIER=ConsEnd | STK=1 |
| 688.15             | 3861.55 | 2013.35 | L08666    | MmugDNA.6316.1.S1_at                      | gDNA.g190199        | FEA=U133PSR         | GEN=VDAC2                                                                                                                | DEF=Orthologous to 211662_s_at voltage-dependent anion channel 2                                                                    | voltage-dependent anion channel 2 |                  |                      |       |
| 262                | 1423.2  | 752.85  | NM_004549 | MmugDNA.29870.1.S1_at                     | gDNA.g4758783       | FEA=U133PSR         | GEN=NDUFC2                                                                                                               | DEF=Orthologous to 218101_s_at NADH dehydrogenase (ubiquinone) 1, subcomplex unknown, 2, 14.5kDa                                    |                                   |                  |                      |       |
| 122.55             | 550     | 404.6   | BC005230  | MmugDNA.13044.1.S1_at                     | gDNA.g13528857      | FEA=U133PSR         | GEN=UQCRCB                                                                                                               | DEF=Orthologous to 209065_at ubiquinol-cytochrome c reductase binding protein                                                       |                                   |                  |                      |       |
| 113.95             | 590.1   | 275.8   | CO726069  | Mmu.12831.2.S1_at                         | gb:CO726069         | DB_XREF=gi:50707380 | DB_XREF=ILLUMIGEN_MCO_42734                                                                                              | CLONE=IBIUW.28236                                                                                                                   | TID=Mmu.12831.2                   | CNT=3            | FEA=EST TIER=ConsEnd | STK=0 |
| 1169               | 5145.8  | 2985.5  | NM_005006 | MmugDNA.17856.1.S1_at                     | gDNA.g4826855       | FEA=U133PSR         | GEN=NDUFS1                                                                                                               | DEF=Orthologous to 203309_s_at NADH dehydrogenase (ubiquinone) Fe-S protein 1, 75kDa (NADH-coenzyme Q reductase)                    |                                   |                  |                      |       |
| 1207.15            | 5201.75 | 3000.4  | NM_001685 | MmugDNA.11379.1.S1_at                     | gDNA.g4502292       | FEA=U133PSR         | GEN=ATP5J                                                                                                                | DEF=Orthologous to 202325_s_at ATP synthase, H+ transporting, mitochondrial F0 complex, subunit F6                                  |                                   |                  |                      |       |
| 883.25             | 3354    | 2598.95 | NM_002492 | MmugDNA.42522.1.S1_at                     | gDNA.g4505362       | FEA=U133PSR         | GEN=NDUFB5                                                                                                               | DEF=Orthologous to 203621_at NADH dehydrogenase (ubiquinone) 1 beta subcomplex, 5, 16kDa                                            |                                   |                  |                      |       |
| 453.45             | 2121.4  | 932.95  | NM_004551 | MmugDNA.29873.1.S1_at                     | gDNA.g4758787       | FEA=U133PSR         | GEN=NDUFS3                                                                                                               | DEF=Orthologous to 201740_at NADH dehydrogenase (ubiquinone) Fe-S protein 3, 30kDa (NADH-coenzyme Q reductase)                      |                                   |                  |                      |       |
| 1063.95            | 4505.7  | 2411.85 | NM_005004 | MmugDNA.17855.1.S1_at                     | gDNA.g4826853       | FEA=U133PSR         | GEN=NDUFB8                                                                                                               | DEF=Orthologous to 201226_at NADH dehydrogenase (ubiquinone) 1 beta subcomplex, 8, 19kDa                                            |                                   |                  |                      |       |
| 254.1              | 1105.9  | 508.25  | NM_002493 | MmugDNA.42525.1.S1_at                     | gDNA.g4505364       | FEA=U133PSR         | GEN=NDUFB6                                                                                                               | DEF=Orthologous to 203613_s_at NADH dehydrogenase (ubiquinone) 1 beta subcomplex, 6, 17kDa                                          |                                   |                  |                      |       |
| 1041.05            | 4327.75 | 2260.1  | NM_001689 | MmugDNA.11978.1.S1_at                     | gDNA.g4502300       | FEA=U133PSR         | GEN=ATP5G3                                                                                                               | DEF=Orthologous to 207508_at ATP synthase, H+ transporting, mitochondrial F0 complex, subunit c (subunit 9) isoform 3               |                                   |                  |                      |       |
| 1227               | 4774.7  | 2778.45 | AV711183  | MmugDNA.356.1.S1_s_agDNA.Hs.155433.3.A1   | FEA=U133PSR         | GEN=ATP5C1          | DEF=Orthologous to 213366_x_at ATP synthase, H+ transporting, mitochondrial F1 complex, gamma polypeptide 1              |                                                                                                                                     |                                   |                  |                      |       |
| 528.5              | 2220.65 | 920.6   | BG260394  | MmugDNA.29351.1.S1_at                     | gDNA.Hs.76930.1.A1  | FEA=U133PSR         | GEN=SNCA                                                                                                                 | DEF=Orthologous to 204466_s_at synuclein, alpha (non A4 component of amyloid precursor)                                             |                                   |                  |                      |       |
| 261.85             | 957.2   | 588.2   | BE741920  | MmugDNA.24918.1.S1_at                     | gDNA.Hs.1665.1.A1   | FEA=U133PSR         | GEN=NDUFA11                                                                                                              | DEF=Orthologous to 225304_s_at NADH dehydrogenase (ubiquinone) 1 alpha subcomplex, 11, 14.7kDa                                      |                                   |                  |                      |       |
| 589.1              | 2743.75 | 705.3   | CN805480  | Mmu.1451.1.S1_at                          | gb:CN805480         | DB_XREF=gi:47701456 | DB_XREF=ILLUMIGEN_MCO_36679                                                                                              | CLONE=IBIUW.11652                                                                                                                   | TID=Mmu.1451.1                    | CNT=17           | FEA=EST TIER=ConsEnd | STK=1 |
| 1468.85            | 4487.2  | 3958.6  | NM_002494 | MmugDNA.42530.1.S1_at                     | gDNA.g4505366       | FEA=U133PSR         | GEN=NDUFC1                                                                                                               | DEF=Orthologous to 203478_at NADH dehydrogenase (ubiquinone) 1, subcomplex unknown, 1, 8kDa                                         |                                   |                  |                      |       |
| 802.2              | 2924.2  | 1641.05 | NM_001916 | MmugDNA.35607.1.S1_at                     | gDNA.g4503184       | FEA=U133PSR         | GEN=CYPC1                                                                                                                | DEF=Orthologous to 201066_at cytochrome c-1                                                                                         |                                   |                  |                      |       |
| 1785.6             | 6266.9  | 3884.65 | AF217092  | MmugDNA.7413.1.S1_at                      | gDNA.g9651636       | FEA=U133PSR         | GEN=DAP13                                                                                                                | DEF=Orthologous to 223244_s_at 13kDa differentiation-associated protein                                                             |                                   |                  |                      |       |
| 173.35             | 584.2   | 401.05  | BC002775  | MmugDNA.24283.1.S1_at                     | gDNA.g12803862      | FEA=U133PSR         | GEN=UBE2G1                                                                                                               | DEF=Orthologous to 209142_s_at ubiquitin-conjugating enzyme E2G 1 (UBC7 homolog, C. elegans)                                        |                                   |                  |                      |       |
| 1118.25            | 4664.65 | 1628.35 | NM_001697 | MmugDNA.11979.1.S1_at                     | gDNA.g4502302       | FEA=U133PSR         | GEN=ATP5F1                                                                                                               | DEF=Orthologous to 200818_at ATP synthase, H+ transporting, mitochondrial F1 complex, O subunit (oligomycin sensitivity conferring) |                                   |                  |                      |       |
| 695.3              | 2489.9  | 1415.7  | BC003674  | MmugDNA.23282.1.S1_s_agDNA.g13277539      | FEA=U133PSR         | GEN=NDUFA2          | DEF=Orthologous to 209224_s_at NADH dehydrogenase (ubiquinone) 1 alpha subcomplex, 2, 8kDa                               |                                                                                                                                     |                                   |                  |                      |       |
| 995.25             | 3629.65 | 1931.75 | NM_001152 | MmugDNA.9969.1.S1_at                      | gDNA.g4502098       | FEA=U133PSR         | GEN=NDUFA5                                                                                                               | DEF=Orthologous to 200657_at solute carrier family 25 (mitochondrial carrier, adenine nucleotide translocator), member 5            |                                   |                  |                      |       |
| 125.74             | 440.25  | 261.75  | L36674    | MmugDNA.8226.1.S1_s_agDNA.g556211         | FEA=U133PSR         | GEN=SNCA            | DEF=Orthologous to 211546_x_at synuclein, alpha (non A4 component of amyloid precursor)                                  |                                                                                                                                     |                                   |                  |                      |       |
| 189.6              | 685.4   | 366.45  | CO648220  | Mmu.9951.1.S1_at                          | gb:CO648220         | DB_XREF=gi:50569714 | DB_XREF=ILLUMIGEN_MCO_41525                                                                                              | CLONE=IBIUW.25875                                                                                                                   | TID=Mmu.9951.1                    | CNT=2            | FEA=EST TIER=ConsEnd | STK=0 |
| 1949.15            | 6135.6  | 3990    | NM_004547 | MmugDNA.18635.1.S1_at                     | gDNA.g6041668       | FEA=U133PSR         | GEN=NDUFB4                                                                                                               | DEF=Orthologous to 218226_s_at NADH dehydrogenase (ubiquinone) 1 beta subcomplex, 4, 15kDa                                          |                                   |                  |                      |       |
| 83                 | 204.35  | 221.85  | AL562528  | MmugDNA.16180.1.S1_at                     | gDNA.Hs.184325.0.A3 | FEA=U133PSR         | GEN=UBE2J1                                                                                                               | DEF=Orthologous to 217823_s_at ubiquitin-conjugating enzyme E2, J1 (UBC6 homolog, yeast)                                            |                                   |                  |                      |       |
| 697.6              | 2434.1  | 1112.9  | BG531983  | MmugDNA.35625.1.S1_s_agDNA.Hs.108104.0.S1 | FEA=U133PSR         | GEN=UBE2L3          | DEF=Orthologous to 200682_s_at ubiquitin-conjugating enzyme E2L 3                                                        |                                                                                                                                     |                                   |                  |                      |       |
| 1038.25            | 3615.45 | 1616.15 | BC005960  | MmugDNA.33303.1.S1_at                     | gDNA.g13543617      | FEA=U133PSR         | GEN=ATP5F1                                                                                                               | DEF=Orthologous to 211755_s_at ATP synthase, H+ transporting, mitochondrial F0 complex, subunit b, isoform 1                        |                                   |                  |                      |       |
| 802.35             | 2589.15 | 1349.05 | AL080089  | MmugDNA.38309.1.S1_s_agDNA.g5262506       | FEA=U133PSR         | GEN=ATP5G1          | DEF=Orthologous to 208972_s_at ATP synthase, H+ transporting, mitochondrial F0 complex, subunit c (subunit 9), isoform 1 |                                                                                                                                     |                                   |                  |                      |       |
| 349.2              | 985.9   | 715.75  | NM_005000 | MmugDNA.13561.1.S1_at                     | gDNA.g13699821      | FEA=U133PSR         | GEN=NDUFA5                                                                                                               | DEF=Orthologous to 201304_at NADH dehydrogenase (ubiquinone) 1 alpha subcomplex, 5, 13kDa                                           |                                   |                  |                      |       |
| 538.3              | 1908.5  | 655.5   | NM_003365 | MmugDNA.8160.1.S1_at                      | gDNA.g4507840       | FEA=U133PSR         | GEN=UQCRC1                                                                                                               | DEF=Orthologous to 201903_at ubiquinol-cytochrome c reductase core protein I                                                        |                                   |                  |                      |       |
| 1069.45            | 3140.6  | 1864.85 | NM_004542 | MmugDNA.29850.1.S1_at                     | gDNA.g4758771       | FEA=U133PSR         | GEN=NDUFA3                                                                                                               | DEF=Orthologous to 218563_at NADH dehydrogenase (ubiquinone) 1 alpha subcomplex, 3, 9kDa                                            |                                   |                  |                      |       |
| 221.7              | 782.05  | 248.45  | BQ807466  | Mmu.3908.1.S1_s_at                        | gb:BQ807466         | DB_XREF=gi:22031675 | DB_XREF=NISC_kk04c11.y2                                                                                                  | CLONE=IMAGE:5330325                                                                                                                 | TID=Mmu.3908.1                    | CNT=12           | FEA=EST TIER=ConsEnd | STK=0 |
| 1621               | 4740.55 | 2763.35 | BC005299  | MmugDNA.31771.1.S1_s_agDNA.g13529022      | FEA=U133PSR         | GEN=CYCS            | DEF=Orthologous to 208905_at cytochrome c, somatic                                                                       |                                                                                                                                     |                                   |                  |                      |       |
| 445.25             | 1224.3  | 834.55  | NM_021075 | MmugDNA.30188.1.S1_at                     | gDNA.Hs.59745.0.S1  | FEA=U133PSR         | GEN=NDUFV3                                                                                                               | DEF=Orthologous to 226616_s_at NADH dehydrogenase (ubiquinone) flavoprotein 3, 10kDa                                                |                                   |                  |                      |       |
| 1380.9             | 3974.3  | 2381    | NM_004552 | MmugDNA.29879.1.S1_at                     | gDNA.g4758789       | FEA=U133PSR         | GEN=NDUFS5                                                                                                               | DEF=Orthologous to 201757_at NADH dehydrogenase (ubiquinone) Fe-S protein 5, 15kDa (NADH-coenzyme Q reductase)                      |                                   |                  |                      |       |

|         |         |         |           |                            |                       |                     |                                |                                |                                                                                             |       |         |              |       |
|---------|---------|---------|-----------|----------------------------|-----------------------|---------------------|--------------------------------|--------------------------------|---------------------------------------------------------------------------------------------|-------|---------|--------------|-------|
| 4121.7  | 10974.8 | 7867.1  | A1587323  | MmugDNA.23434.1.S1_at      | gDNA.Hs.155101.3.A1   | FEA=U133PSR         | GEN=ATP5A1                     | DEF=Orthologous to 213738_s_at | ATP synthase, H+ transporting, mitochondrial F1 complex, alpha subunit1, cardiac muscle     |       |         |              |       |
| 540.3   | 1558.75 | 902.35  | NI_005001 | MmugDNA.17832.1.S1_at      | gDNA.g4826849         | FEA=U133PSR         | GEN=NDUFA7                     | DEF=Orthologous to 202785_at   | NADH dehydrogenase (ubiquinone) 1 alpha subcomplex, 7, 14.5kDa                              |       |         |              |       |
| 1014.95 | 2882.5  | 1691.65 | NM_006830 | MmugDNA.14855.1.S1_at      | gDNA.g5803216         | FEA=U133PSR         | GEN=UQCRC2                     | DEF=Orthologous to 202090_s_at | ubiquinol cytochrome c reductase, 6.4kDa subunit                                            |       |         |              |       |
| 1822.15 | 4590.5  | 3391.4  | NM_004374 | MmugDNA.24731.1.S1_at      | gDNA.g4758039         | FEA=U133PSR         | GEN=COX6C                      | DEF=Orthologous to 201754_at   | cytochrome c oxidase subunit VIc                                                            |       |         |              |       |
| 622.8   | 1974.85 | 740.95  | NM_003334 | MmugDNA.7386.1.S1_at       | gDNA.g4507762         | FEA=U133PSR         | GEN=UBE1                       | DEF=Orthologous to 200964_at   | ubiquitin-activating enzyme E1 (A1S9T and BN75 temperature sensitivity complementing)       |       |         |              |       |
| 274.5   | 649.6   | 535.85  | AW299555  | MmugDNA.37118.1.S1_at      | gDNA.Hs.78563.0.A3    | FEA=U133PSR         | GEN=UBE2G1                     | DEF=Orthologous to 209141_at   | ubiquitin-conjugating enzyme E2G 1 (UBC7 homolog, C. elegans)                               |       |         |              |       |
| 311.1   | 868.05  | 434.95  | AF092131  | MmugDNA.23407.1.S1_at      | gDNA.g5138911         | FEA=U133PSR         | GEN=NDUFV1                     | DEF=Orthologous to 208714_at   | NADH dehydrogenase (ubiquinone) flavoprotein 1, 51kDa                                       |       |         |              |       |
| 1486.45 | 4239.9  | 1881.9  | AF261090  | MmugDNA.726.1.S1_at        | gDNA.g9802311         | FEA=U133PSR         | GEN=NDUFB9                     | DEF=Orthologous to 222992_s_at | NADH dehydrogenase (ubiquinone) 1 beta subcomplex, 9, 22kDa                                 |       |         |              |       |
| 145.4   | 442.2   | 154.05  | NM_003001 | MmugDNA.9551.1.S1_at       | gDNA.g9257243         | FEA=U133PSR         | GEN=SDHC                       | DEF=Orthologous to 202004_x_at | succinate dehydrogenase complex, subunit C, integral membrane protein, 15kDa                |       |         |              |       |
| 474.75  | 1115.3  | 799.85  | NM_002490 | MmugDNA.42509.1.S1_at      | gDNA.g4505358         | FEA=U133PSR         | GEN=NDUFA6                     | DEF=Orthologous to 202001_s_at | NADH dehydrogenase (ubiquinone) 1 alpha subcomplex, 6, 14kDa                                |       |         |              |       |
| 156.5   | 460.35  | 167.95  | NI_000345 | MmugDNA.6691.1.S1_at       | gDNA.g6806896         | FEA=U133PSR         | GEN=SNCA                       | DEF=Orthologous to 204467_s_at | synuclein, alpha (non A4 component of amyloid precursor)                                    |       |         |              |       |
| 1912.35 | 5351.5  | 2283.55 | BC005299  | MmugDNA.31771.1.S1_at      | gDNA.g13529022        | FEA=U133PSR         | GEN=CYCS                       | DEF=Orthologous to 208905_at   | cytochrome c, somatic                                                                       |       |         |              |       |
| 61.75   | 73.75   | 169.25  | NM_016021 | MmugDNA.15202.1.S1_at      | gDNA.g7706311         | FEA=U133PSR         | GEN=UBE2J1                     | DEF=Orthologous to 217826_s_at | ubiquitin-conjugating enzyme E2, J1 (UBC6 homolog, yeast)                                   |       |         |              |       |
| 2596.15 | 5667.65 | 4387.65 | NM_006886 | MmugDNA.5716.1.S1_at       | gDNA.g5901895         | FEA=U133PSR         | GEN=ATP5E                      | DEF=Orthologous to 217801_at   | ATP synthase, H+ transporting, mitochondrial F1 complex, epsilon subunit                    |       |         |              |       |
| 1277.75 | 3027.05 | 1739.8  | BC005270  | MmugDNA.13810.1.S1_at      | gDNA.g13528959        | FEA=U133PSR         | GEN=NDUFS4                     | DEF=Orthologous to 209303_at   | NADH dehydrogenase (ubiquinone) Fe-S protein 4, 18kDa (NADH-coenzyme Q reductase)           |       |         |              |       |
| 1009.95 | 2558.8  | 1198.95 | NM_004550 | MmugDNA.29871.1.S1_s_agDNA | g4758785              | FEA=U133PSR         | GEN=NDUFS2                     | DEF=Orthologous to 201966_at   | NADH dehydrogenase (ubiquinone) Fe-S protein 2, 49kDa (NADH-coenzyme Q reductase)           |       |         |              |       |
| 2895.45 | 6709.7  | 3833.35 | BC006229  | MmugDNA.8169.1.S1_s_atgDNA | g13623258             | FEA=U133PSR         | GEN=COX5B                      | DEF=Orthologous to 211025_x_at | cytochrome c oxidase subunit Vb cytochrome c oxidase subunit Vb                             |       |         |              |       |
| 148.3   | 354.8   | 181.75  | BE964689  | MmugDNA.35627.1.S1_at      | gDNA.Hs.108104.0.S2   | FEA=U133PSR         | GEN=UBE2L3                     | DEF=Orthologous to 200683_s_at | ubiquitin-conjugating enzyme E2L 3                                                          |       |         |              |       |
| 764.1   | 1759.65 | 958.85  | NM_001864 | MmugDNA.16709.1.S1_s_agDNA | g4502986              | FEA=U133PSR         | GEN=COX7A1                     | DEF=Orthologous to 204570_at   | cytochrome c oxidase subunit VIIa polypeptide 1 (muscle)                                    |       |         |              |       |
| 2127.65 | 4441.15 | 2915.7  | NI_006004 | MmugDNA.38710.1.S1_at      | gDNA.g5174744         | FEA=U133PSR         | GEN=UQCRCR                     | DEF=Orthologous to 202233_s_at | ubiquinol-cytochrome c reductase hinge protein                                              |       |         |              |       |
| 406.5   | 820.9   | 496.75  | NM_001151 | MmugDNA.9968.1.S1_s_atgDNA | g4502096              | FEA=U133PSR         | GEN=SLC25A4                    | DEF=Orthologous to 202825_at   | solute carrier family 25 (mitochondrial carrier; adenine nucleotide translocator), member 4 |       |         |              |       |
| 269.45  | 569.35  | 283.75  | NM_004223 | MmugDNA.7052.1.S1_at       | gDNA.g4759281         | FEA=U133PSR         | GEN=UBE2L6                     | DEF=Orthologous to 201649_at   | ubiquitin-conjugating enzyme E2L 6                                                          |       |         |              |       |
| 846.8   | 2573.45 | 611     | NM_015965 | MmugDNA.37472.1.S1_at      | gDNA.g7705733         | FEA=U133PSR         | GEN=GRIM19                     | DEF=Orthologous to 220864_s_at | cell death-regulatory protein GRIM19                                                        |       |         |              |       |
| 111.1   | 281.7   | 104.05  | NI_013247 | MmugDNA.43070.1.S1_at      | gDNA.g7019476         | FEA=U133PSR         | GEN=PRSS25                     | DEF=Orthologous to 203089_s_at | protease, serine, 25                                                                        |       |         |              |       |
| 76.45   | 72.8    | 189     | CO648050  | Mmu.4246.1.S1_s_at         | gb:CO648050           | DB_XREF=gi:50569544 | DB_XREF=ILLUMIN_GEN_MCOQ_41314 | CLONE=IBIUW:22812              | TID=Mmu.4246.1                                                                              | CNT=2 | FEA=EST | TIER=ConsEnd | STK=0 |
| 367.9   | 863.9   | 366.5   | NM_019056 | MmugDNA.38548.1.S1_s_agDNA | g9506682              | FEA=U133PSR         | GEN=NDUFB11                    | DEF=Orthologous to 218320_s_at | NADH dehydrogenase (ubiquinone) 1 beta subcomplex, 11, 17.3kDa                              |       |         |              |       |
| 460.05  | 929.35  | 442.45  | NM_004146 | MmugDNA.6319.1.S1_s_atgDNA | g10764846             | FEA=U133PSR         | GEN=NDUFB7                     | DEF=Orthologous to 202839_s_at | NADH dehydrogenase (ubiquinone) 1 beta subcomplex, 7, 18kDa                                 |       |         |              |       |
| 4825.45 | 9822.2  | 4378.65 | CD768031  | Mmu.7399.1.S1_at           | gb:CD768031           | DB_XREF=gi:32426533 | DB_XREF=AGENCOURT_14718956     | CLONE=IMAGE:6973306            | TID=Mmu.7399.1                                                                              | CNT=1 | FEA=EST | TIER=ConsEnd | STK=1 |
| 536.45  | 256.8   | 577.1   | AA993683  | MmugDNA.5110.1.S1_at       | gDNA.Hs.163867.1.A1   | FEA=U133PSR         | GEN=PRO1580                    | DEF=Orthologous to 213550_s_at | hypothetical protein PRO1580                                                                |       |         |              |       |
| 268.6   | 120.4   | 270.55  | BC000462  | MmugDNA.5643.1.S1_at       | gDNA.g12653384        | FEA=U133PSR         | GEN=UQCRC                      | DEF=Orthologous to 223613_at   | ubiquinol cytochrome c reductase, 6.4kDa subunit                                            |       |         |              |       |
| 179.85  | 169.25  | 83.3    | NM_003366 | MmugDNA.8162.1.S1_at       | gDNA.g4507842         | FEA=U133PSR         | GEN=UQCRC2                     | DEF=Orthologous to 200883_at   | ubiquinol-cytochrome c reductase core protein II                                            |       |         |              |       |
| 147.1   | 89.25   | 73.3    | AF184911  | MmugDNA.35310.1.S1_at      | gDNA.g10121319        | FEA=U133PSR         | GEN=PRSS25                     | DEF=Orthologous to 211152_s_at | protease, serine, 25                                                                        |       |         |              |       |
| 435.9   | 143.3   | 421.55  | AF453834  | MmugDNA.40691.1.S1_at      | gDNA.Hs2.198271.3.S1  | FEA=U133PSR         | GEN=NDUFA10                    | DEF=Orthologous to 1555548_at  | NADH dehydrogenase (ubiquinone) 1 alpha subcomplex, 10, 42kDa                               |       |         |              |       |
| 294.8   | 97.15   | 274.75  | AW190316  | MmugDNA.3420.1.S1_at       | gDNA.Hs.2186.4.A1     | FEA=U133PSR         | GEN=SHMT2                      | DEF=Orthologous to 214095_at   | serine hydroxymethyltransferase 2 (mitochondrial)                                           |       |         |              |       |
| 213.2   | 92.1    | 110.6   | AI760495  | MmugDNA.15069.1.S1_at      | gDNA.Hs.205711.0.A1   | FEA=U133PSR         | GEN=CYCS                       | DEF=Orthologous to 244546_at   | cytochrome c, somatic                                                                       |       |         |              |       |
| 363.5   | 118.1   | 284.75  | AB062482  | MmugDNA.34532.1.S1_at      | gDNA.Hs2.374685.1.S1  | FEA=U133PSR         | GEN=NDUFS4                     | DEF=Orthologous to 1555057_at  | NADH dehydrogenase (ubiquinone) Fe-S protein 4, 18kDa (NADH-coenzyme Q reductase)           |       |         |              |       |
| 402.65  | 99.1    | 314.3   | NM_001867 | MmugDNA.16732.1.S1_at      | gDNA.g4502992         | FEA=U133PSR         | GEN=COX7C                      | DEF=Orthologous to 201134_x_at | cytochrome c oxidase subunit VIIC                                                           |       |         |              |       |
| 332     | 79.8    | 222.7   | AF149794  | MmugDNA.37633.1.S1_at      | gDNA.g4929486         | FEA=U133PSR         | GEN=APAF1                      | DEF=Orthologous to 211554_s_at | apoptotic protease activating factor                                                        |       |         |              |       |
| 539.35  | 140.7   | 242.2   | AA382702  | MmugDNA.43583.1.S1_x_agDNA | g3462.1.S1            | FEA=U133PSR         | GEN=COX7C                      | DEF=Orthologous to 213846_at   | cytochrome c oxidase subunit VIIC                                                           |       |         |              |       |
| 358.15  | 209.95  | 68.9    | AW500009  | MmugDNA.16183.1.S1_at      | gDNA.Hs.184325.0.A5   | FEA=U133PSR         | GEN=UBE2J1                     | DEF=Orthologous to 217824_at   | ubiquitin-conjugating enzyme E2, J1 (UBC6 homolog, yeast)                                   |       |         |              |       |
| 307.95  | 50.05   | 59.65   | AK002110  | MmugDNA.24532.1.S1_at      | gDNA.Hs.90443.1.A1    | FEA=U133PSR         | GEN=NDUFS8                     | DEF=Orthologous to 232169_x_at | NADH dehydrogenase (ubiquinone) Fe-S protein 8, 23kDa (NADH-coenzyme Q reductase)           |       |         |              |       |
| 251.95  | 15.05   | 236.55  | AF258566  | MmugDNA.21374.1.S1_at      | gDNA.Hs2A1fx.1.256.S1 | FEA=U133PSR         | GEN=UBE1                       | DEF=Orthologous to 1555387_at  | ubiquitin-activating enzyme E1 (A1S9T and BN75 temperature sensitivity complementing)       |       |         |              |       |
